## **Topographic connectivity and cellular profiling reveal detailed input pathways and functionally distinct cell types in the subthalamic nucleus**

Hyungju Jeon<sup>1,6</sup>, Hojin Lee<sup>1,2,6</sup>, Dae-Hyuk Kwon<sup>3</sup>, Jiwon Kim<sup>1,2</sup>, Keiko Tanaka-Yamamoto<sup>1,2</sup>, Linqing Feng<sup>1</sup>, Hyeran Park<sup>4</sup>, Yong Hoon Lim<sup>5</sup>, Zang-Hee Cho<sup>3</sup>, Sun Ha Paek<sup>5</sup>, and Jinhyun Kim<sup>1,2,\*</sup>

<sup>1</sup>Center for Functional Connectomics, Korea Institute of Science and Technology (KIST), Seoul, 02792, Korea. <sup>2</sup>Division of Bio-Medical Science & Technology, KIST-School, University of Science and Technology, Seoul, 02792, Korea. <sup>3</sup>Neuroscience Convergence Center, Korea University, Seoul, 02841, Korea. <sup>4</sup>Soonchunhyang University Seoul Hospital, Seoul, 04401, Korea. <sup>5</sup>Neurosurgery, Movement Disorder Center, Seoul National University College of Medicine, Advanced Institute of Convergence Technology (AICT), Seoul National University, Seoul, 03080, Korea

<sup>6</sup>H.J., and H.L. contributed equally to this work.

\*To whom correspondence may be addressed: Jinhyun Kim ([jinnykim@me.com](mailto:jinnykim@me.com)).

Center for Functional Connectomics (CFC), L7-7211, Brain Science Institute at the Korea Institute of Science & Technology (KIST), 39-1 Hawolgokdong, Seongbukgu, Seoul 02792, Korea; phone: +82-2-958-7225

Further information and requests for resources and reagents should be directed to and will be fulfilled by the lead contact, Jinhyun Kim ([jinnykim@me.com](mailto:jinnykim@me.com)).

1 **Summary:** The subthalamic nucleus (STN) controls psychomotor activity and is an efficient  
2 therapeutic deep brain stimulation target in Parkinson's disease patients. Despite evidence  
3 indicating position-dependent therapeutic effects and distinct functions within the STN, input  
4 circuit and cellular profile in the STN remain largely unclear. Using advanced neuroanatomical  
5 techniques, we constructed a comprehensive connectivity map of the indirect and hyperdirect  
6 pathways in both the mouse and human STN. Our detailed circuit- and cellular-level connectivity  
7 revealed a topographically graded organization with three convergent types of indirect and  
8 hyperdirect-pathways. Furthermore, we identified two functional types of glutamatergic STN  
9 neurons (parvalbumin, PV +/- neurons) segregated with a topographical distribution.  
10 Glutamatergic PV+ STN neurons contribute to burst firing. We confirmed synaptic connectivity  
11 from indirect and hyperdirect pathways to both PV+ and PV-. These data suggest a complex  
12 interplay of information integration within the basal ganglia underlying coordinated movement  
13 control and therapeutic effects.

**Keywords:** Subthalamic nucleus; connectivity; indirect and hyperdirect pathways; cell type; firing pattern;

## 14 **Introduction**

15

16 The subthalamic nucleus (STN), a key element of the basal ganglia (BG), plays a central role in  
17 psychomotor control and serves as the most efficient therapeutic target of deep brain stimulation  
18 (DBS) in Parkinson's disease patients (Benabid et al., 2009; Bergman et al., 1990; Bevan, 2017;  
19 Eisenstein et al., 2014; Group, 2001; Herzog et al., 2004; Kopell et al., 2006; Limousin et al.,  
20 1995; Lozano and Lipsman, 2013). Within the STN, two principal tracts modulate the activity of  
21 the BG: the indirect and hyperdirect pathways. The indirect pathway carries most GABAergic  
22 inputs to the STN from external globus pallidus (GPe) neurons (Mallet et al., 2012; Smith et al.,  
23 1998), while the hyperdirect pathway carries most glutamatergic inputs to the STN (**Figure 1A**)  
24 (Monakow et al., 1978; Nambu et al., 2002; Smith et al., 1998). The balance of synaptic excitation  
25 and inhibition is critical to the operation of brain microcircuits, and this balance is often perturbed  
26 in diseases (Chu et al., 2017; Cobos et al., 2005; del Pino et al., 2013; Fan et al., 2012; Kopell et  
27 al., 2006; Turrigiano, 2011; Yizhar et al., 2011). The effects of STN DBS appear to involve an  
28 interplay of converging inhibitory indirect and excitatory hyperdirect pathways, as well as multiple  
29 interactions from molecular and cellular processes that translate into global network effects  
30 (Gradinaru et al., 2009; Hashimoto et al., 2003; Hemptinne et al., 2015; Li et al., 2012; Stefani et  
31 al., 2005; Windels et al., 2000). Although there is evidence indicating heterogeneous firing  
32 patterns, distinct functional movement control, and electrode position-dependent therapeutic  
33 effects including side-effects of DBS within the STN (Herzog et al., 2004; Kaku et al., 2019; Kim et  
34 al., 2015; Mallet et al., 2012; Mosher et al., 2021; Wodarg et al., 2012), detailed topographical  
35 profiling of connectivity, cytoarchitecture, and physiological properties remain incomplete. Thus,  
36 comprehensive information regarding these input patterns as well as cellular profiles of the STN  
37 is critical for deepening our understanding of normal movement control, Parkinson's disease, and  
38 DBS. Here, using advanced neuroanatomical techniques, we developed detailed three-  
39 dimensional (3D) descriptions of the convergent connectivity in the indirect and hyperdirect  
40 pathways, as well as molecular and cellular profiles of STN circuitry. Our analysis includes a

41 comparison of ultrahigh-resolution fiber tractography in the human STN with respect to the  
42 effectiveness of STN DBS in Parkinson's disease patients. Our circuit-level connectivity revealed  
43 a topographically graded organization, with overlaps and no evident anatomical boundaries, and  
44 direct cortico-pallidal connection in both the mouse and human STN. Together with cellular-level  
45 connectivity analysis, we found, at least, three convergent types of indirect and hyperdirect-  
46 pathway (GPe-only, STN-only, and both) suggesting complex signal integration, such as a  
47 classical convergence of inhibition and excitation, feedforward inhibition, and collateral  
48 convergence. These circuit features imply functional computational complexity and delicate  
49 control. Furthermore, we identified two functional types of glutamatergic STN parvalbumin (PV)  
50 +/- neurons that integrate information from both indirect and hyperdirect pathways, are  
51 segregated along a topographical distribution. Glutamatergic PV+ neurons show phasic burst  
52 firing and are particularly prevalent in the dorsolateral and middle STN, whereas PV- neurons fail  
53 to generate burst firing and prevalent in the ventromedial and middle STN. In addition, we  
54 confirmed synaptic connectivity from indirect and hyperdirect pathways to PV+/- neurons by  
55 combining retrograde virus injections and mammalian GFP reconstitution across synapses  
56 (mGRASP) (Kato et al., 2014; Kim et al., 2012). Our analysis corrects errors and adds a critical  
57 new level of detail to understanding STN circuitry.

58 **Results**

59

60 **Indirect pathway in the STN**

61 To comprehensively analyze the organization of the indirect pathway in the mouse STN ( $IP_{STN}$ ),  
62 we employed a mesoscopic approach with the following components: 1) topographic labeling of  
63 subsets of GPe neurons with adeno-associated virus (AAV) expressing green or red fluorescent  
64 proteins (sfGFP or tdTomato), 2) computational reconstruction of axonal projection patterns, and  
65 3) connecto-informatics of the GPe-STN circuit (**Figure 1; Figure S1–3; see STAR Methods**). To  
66 obtain  $IP_{STN}$  data, we conducted 73 injections into the GPe, serially imaged the GPe and STN,  
67 and then aligned our images to the Allen Mouse Brain Common Coordinate Framework (CCF v3,  
68 <https://mouse.brain-map.org>; **Figure 1A; Figure S1A; Movie S1**). After filtering our data to  
69 remove artifactual and weak projection signals, the results from 55 injections covering 84% of the  
70 GPe volume were further analyzed for  $IP_{STN}$  patterns (**Figure 1B; Figure S1B, C; Table S1**).  
71 Injections and axonal projections were reconstructed onto the segmented GPe and STN,  
72 respectively (**Figure S2**).

73 To investigate  $IP_{STN}$  connectivity patterns, we constructed heatmaps of GPe injection and  
74 STN projection ( $IP_{STN}$ ) distributions along the whole-brain anatomic axes, that is, anterior-  
75 posterior (AP), medial-lateral (ML), and dorsal-ventral (DV; **Figure 1C; Figure S3A, B**). The  
76 centrality of the signal distribution was used to identify injection and projection sites, and to  
77 subsequently measure their correlation. These heatmaps show that while projection signals were  
78 dispersed throughout the STN, injection signals were restricted to specific topographic loci in the  
79 GPe, which is desirable for fine connectivity mapping. Reconstructed STN projection patterns  
80 show a graded distribution with a notable degree of overlap, rather than divisible sub-territories  
81 (**Figure 1C–E; Figure S2, 3**) (Lambert et al., 2012; Mallet et al., 2007; Parent and Hazrati, 1995;  
82 Plantinga et al., 2018). This gradient was predominantly oriented along the ventromedial to  
83 dorsolateral axis, corresponding with the geometric longitudinal axis of the STN, termed “STN  
84 axis1”, and also along the transverse direction, perpendicular to the longitudinal axis, termed

85 “STN axis2” (**Figure 1D, and 1F**). Although the centroid-based measurement effectively  
86 represents the projection sites, it may not fully portray the varying spatial pattern of broadly  
87 dispersed axonal projections. Therefore, we used multidimensional scaling (MDS) that visualizes  
88 the level of similarity of projection patterns in a 3D space, termed “pattern space” (see **STAR**  
89 **Methods**). Projections in a pattern space generated by MDS were continuously arranged with  
90 little or no noticeable segregation along two major dimensions which were significantly correlated  
91 with the STN axes (**Figure 1G**). Consistent with the centroid analysis, MDS confirmed graded  
92 topographic organization of  $IP_{STN}$  along the geometrical axes of the STN (STN axes 1 and 2). We  
93 then investigated the topographic relationships between inputs originating in the GPe and their  
94 projection targets by pairwise comparison of each GPe input locus and its corresponding  
95 projection locus in the STN along STN axes 1 and 2. Our analysis of input and projection  
96 distributions in the indirect pathway indicated that injection sites in the GPe are topographically  
97 aligned linearly along two directions, matching the geometric longitudinal and transverse axes of  
98 the GPe itself (**Figure 1H**; see **STAR Methods**). Interestingly, along STN axis2, the input-  
99 projection pattern was reversely related, revealing a “cross-over” projection pattern from the GPe  
100 to the STN. Our detailed analysis of GPe-STN connectivity clearly shows graded  $IP_{STN}$   
101 organization along geometric axes, with generally extensive overlaps and an absence of sharp  
102 boundaries.

103

#### 104 **Hyperdirect pathway in the STN**

105 Next, to comprehensively assess the organization of the hyperdirect pathway in the STN ( $HP_{STN}$ ),  
106 we extracted data from the Allen Mouse Brain Connectivity Atlas dataset (AMBCA,  
107 <https://connectivity.brain-map.org>) (Oh et al., 2014) regarding axonal projections following  
108 isocortical injections. Our data-filtering criteria included detectable STN projection signals and  
109 contamination of cortical injection (**Figure 2A**; **Figure S1A and 4A–C**; see **STAR Methods**). The  
110 resulting dataset included 176 injections with AAV-expressing fluorescent proteins throughout the  
111 isocortex, covering 71% of the volume of layer (L) 5 in wild-type C57BL/6J mice and nine

112 transgenic Cre lines shown to have L5-specific expression of Cre (**Figure 2B; Table S2, 3**).  
113 Additionally, our own retrograde tracer experiments using retro-AAV or -Lenti systems (Kato et  
114 al., 2014; Tervo et al., 2016) confirmed that HP<sub>STN</sub> arises in various cortical subregions, mainly  
115 from a subpopulation of corticofugal neurons in the ipsilateral L5, which is consistent with  
116 previous observations (Kita and Kita, 2012) (**Figure S4D**).

117 Information flow from the cortex to the BG is believed to progress through a hierarchical  
118 series of sensorimotor, association, and limbic areas, supporting the tripartite STN model  
119 (Lambert et al., 2012; Mallet et al., 2007; Parent and Hazrati, 1995; Plantinga et al., 2018).  
120 However, much of the data leading to this view regarding the subdivisions of the STN are  
121 qualitative, variable, fragmented, and difficult to reconcile, owing to the technical limitations of  
122 neuroanatomical research (Alkemade and Forstmann, 2014; Keuken et al., 2012; Lambert et al.,  
123 2015). Therefore, to update this view of the STN, we first performed an inclusive analysis at the  
124 level of region-to-region connectivity of the HP<sub>STN</sub>. We found that STN projection patterns from  
125 each cortical subregion exhibited distinct yet extensively overlapping projection patterns (**Figure**  
126 **2C**). For instance, projections from motor cortical areas such as the primary and secondary motor  
127 areas (MOp and MOs) broadly targeted the center region of the STN, while those from sensory  
128 areas such as primary and supplemental somatosensory areas (SSp and SSs) targeted the  
129 dorsolateral STN (anatomic abbreviations and functional groups shown in **Table S2**). Association  
130 areas, such as the retrosplenial (RSP), visual (VIS), and visceral (VISC) area, and limbic areas,  
131 such as anterior cingulate (ACA) and orbital (ORB) area, contained dorsolateral and ventromedial  
132 STN projections spanning the central part of STN, respectively. Overall, our analysis of STN  
133 projection patterns showed much broader coverage, with more extensive overlap than previously  
134 thought (Lambert et al., 2012; Mallet et al., 2007; Parent and Hazrati, 1995; Plantinga et al.,  
135 2018). Furthermore, within motor and sensory cortices, we found that individual injections  
136 revealed variable and distinct yet overlapping projections in the STN (**Figure 2D**). Hence, we  
137 investigated the organization of the HP<sub>STN</sub> using non-biased techniques, such as a voxel-based  
138 analysis that disregards anatomically defined cortical subregions. Similar to our analysis of the

139 IP<sub>STN</sub> described above, we examined the distributions of cortical inputs and STN projections along  
140 the whole-brain anatomic axes (AP, ML, and DV). We found that the HP<sub>STN</sub> had a graded  
141 distribution with a notable degree of overlap along STN axis1 (**Figure 2E**). Furthermore, MDS  
142 analysis indicated that the 3D projection patterns of the HP<sub>STN</sub> were gradually distributed along  
143 STN axis1 and axis2 (**Figure 2F**). Together, these results indicate that the HP<sub>STN</sub> has graded  
144 organization along geometric axes, with overlaps and an absence of sharp boundaries, which  
145 prompts re-evaluation of the conventional view of a functionally subdivided STN determined by  
146 cortical input patterns.

147

### 148 **Hyperdirect pathway in the GPe**

149 We expanded our analysis of the hyperdirect pathway to include projection patterns in the GPe.  
150 Based on previous reports (Abecassis et al., 2020; Karube et al., 2019; Naito and Kita, 1994;  
151 Winnubst et al., 2019) showing the existence of direct cortico-pallidal connections, we questioned  
152 whether the hyperdirect pathway providing direct cortico-pallidal projections into the GPe (called  
153 HP<sub>GPe</sub>) collaterally provides HP<sub>STN</sub>, and how HP<sub>GPe</sub> displays topographic distributions. First, we  
154 injected retro-AAV-iCre and Cre-dependent AAV-JxON-tdTomato into the GPe and MOp,  
155 respectively, and then cleared the tissue. Our results revealed strong collateral projections from  
156 labeled MOp neurons in both the GPe and STN with additional downstream targets in the  
157 substantia nigra (SN) and superior colliculus (SC), but few or no targets in contralateral cortical  
158 areas (**Figure 3A**). As with the HP<sub>STN</sub>, we observed graded organization within the HP<sub>GPe</sub>. The  
159 HP<sub>GPe</sub> appeared to be topographically organized with fidelity to the whole-brain anatomic axes  
160 and segmented into a tripartite form. This was especially the case with respect to inputs arising in  
161 association and limbic areas, which is comparable to the HP<sub>STN</sub> (**Figure 3B**). This organization  
162 might arise through the innate geometric situation of the GPe matched with the whole-brain  
163 anatomic axes and/or the larger receptive volume of the GPe compared with the STN. Next, we  
164 conducted pairwise topographic matching between the loci of cortical inputs and projections in the  
165 GPe (HP<sub>GPe</sub>). We found two major axes of topographic organization of hyperdirect pathway inputs



166 and the  $HP_{GPe}$  that were correlated and reversely correlated along STN axis1 and axis2,  
167 respectively (**Figure 3C, D; Figure S5A**). These gradient axes of the  $HP_{GPe}$  appeared to match  
168 the geometric axes of the GPe, which is similar to the gradient axes observed for input into the  
169 indirect pathway. To examine the relationship between the two pathways along these gradient  
170 axes, we performed a paired comparison between the IP and HP patterns. For this analysis, we  
171 measured the similarity between the pathways in the STN and GPe, respectively. The  $HP_{STN}$  and  
172  $IP_{STN}$  projection patterns were used to examine the gradient similarity in the STN, while the  $HP_{GPe}$   
173 and indirect pathway input ( $IP_{INPUT}$ ) were used for that in the GPe. We then calculated the  
174 correlation between these pairwise similarities in the STN and GPe. We found strong similarities  
175 in STN projection patterns between the  $IP_{STN}$  and  $HP_{STN}$  when the  $IP_{INPUT}$  and  $HP_{GPe}$  locus were  
176 located close together (**Figure 3E**).

177

### 178 **Complex integration of the indirect and hyperdirect pathways in the STN**

179 Given our findings that the  $IP_{STN}$ ,  $HP_{STN}$ , and  $HP_{GPe}$  are topographically organized with gradient  
180 convergence at the mesoscopic level, we next performed a detailed analysis of HP connectivity at  
181 the cellular level. To dissect HP connectivity types, we first labeled cortical neurons innervating  
182  $HP_{STN}$  and/or  $HP_{GPe}$  by injecting retro-AAV-tdTomato and -sfGFP in the STN and GPe,  
183 respectively. We identified three types of cortical neurons in L5 of MOp: Those innervating only  
184  $HP_{STN}$ , only  $HP_{GPe}$ , and both  $HP_{GPe/STN}$  (**Figure 3F**). Additionally, by data-mining single-neuron  
185 reconstruction data from the MouseLight project (<http://www.mouselight.janelia.org>) (Winnubst et  
186 al., 2019), we confirmed the existence of these three types of cortical neurons (**Figure 3G**;  
187 **Figure S5B, C**). Neurons innervating the  $HP_{STN}$  are predominantly pyramidal tract (PT) neurons,  
188 while those innervating the  $HP_{GPe}$  are both PT and intratelencephalic (IT) neurons, with a subset  
189 (~15 %) that collaterally innervate the  $HP_{GPe/STN}$ . Notably, the axonal density of neurons  
190 innervating the  $HP_{GPe/STN}$  in the STN is 3.7-fold higher than that in the GPe. Consistent with our  
191 mesoscopic retrograde tracer data, shown in **Figure 3A**, we found that cortical neurons  
192 innervating the  $HP_{GPe/STN}$  send collateral innervations to multiple brain areas such as the striatum

193 (STR), SN, SC, and others, which suggests that these neurons may help orchestrate movement.  
194 Although we analyzed a small set of reconstructed single neurons, their projection patterns were  
195 consistent with our mesoscopic, topographic analysis of the HP<sub>GPe</sub> and HP<sub>STN</sub> (**Figure S5D**). Our  
196 results indicate that at least three types of signals from the indirect and hyperdirect pathways in  
197 the STN are integrated, including a classical form of convergence of inhibition and excitation,  
198 feedforward inhibition, and collateral convergence (parallel after-discharge-like circuitry; **Figure**  
199 **3H**). In addition, we confirmed HP projections into the human STN at the macroscopic scale by  
200 7T-MRI-based *in vivo* ultrahigh-resolution fiber tractography of a healthy human brain (**Figure S6**;  
201 **Table S4**; see **STAR Methods**). Our seed-based probabilistic tractography of the HP revealed a  
202 direct cortico-pallidal connection, the HP<sub>GPe</sub>, and a collateral HP<sub>GPe/STN</sub> in the human brain, similar  
203 to those we observed in mice (**Figure S6B, C**). We divided cortical subregions into three groups:  
204 motor, limbic, and association (further divided into prefrontal- and rest-association) areas (**Table**  
205 **S2**). HP projections from the association, motor, and limbic areas were only somewhat  
206 segregated in the ventromedial, dorsolateral, and ventrolateral areas, respectively, appearing  
207 along the longitudinal axis of the STN (axis1). However, as we observed in the mouse HP<sub>STN</sub>,  
208 there was a high degree of overlap and no evident anatomical borders or clear subdivisions  
209 (**Figure S7D–H**). We also found the HP<sub>STN</sub>, HP<sub>GPe</sub>, and collateral HP<sub>GPe/STN</sub> organization in the  
210 human brain to be consistent with the complex signal integration patterns in the mouse. In  
211 agreement with our mouse connectivity maps, our analysis of human 7T MRI-based tractography  
212 data revealed considerable and gradual overlap along the longitudinal axis of the human STN.  
213 Together, these results suggest that graded convergence of IP<sub>STN</sub> and HP<sub>STN</sub> is organized along  
214 the STN geometric axes, and that GPe neurons innervating the IP<sub>STN</sub> might be activated by the  
215 same HP<sub>STN</sub>. These circuit features imply functional computational complexity and delicate  
216 control, updating classical models (DeLong and Wichmann, 2015) with the idea that the indirect  
217 and hyperdirect pathways participate in relaying and integrating information needed for  
218 coordinated movement.

219

## 220 Cellular composition of the STN

221 The way in which STN neurons process convergent inputs from the IP and HP depends critically  
222 on the molecular and cellular properties of these neurons. The STN is generally described as a  
223 homogenous glutamatergic nucleus of the BG. To test this, we used serial single-molecule  
224 fluorescence in situ hybridization (smFISH) with a custom computational analysis for cell-type  
225 markers and receptors to examine the topographic molecular and cellular profile of the STN  
226 (**Figure 4A**; see **STAR Methods**). Most STN neurons identified by the neuronal marker *Rbfox3*  
227 co-expressed the glutamatergic marker *Slc17a6*, while very few neurons co-expressed the  
228 GABAergic marker *Slc32a1*. Approximately half of the STN cells expressed glia-associated genes  
229 (*Aqp4*, *Mbp*, and *Tmem119*) (**Figure S7**). Thus, our serial smFISH, immunostaining, and  
230 topographic analysis confirmed that most neurons in the STN are purely glutamatergic. Previous  
231 anatomical studies have reported the presence of parvalbumin-expressing (PV+) neurons in the  
232 STN (Alkemade et al., 2019; Hontanilla et al., 1998; Lévesque and Parent, 2005; Wu et al.,  
233 2018). PV expression is conventionally interpreted to reflect a GABAergic subpopulation (Hu et  
234 al., 2014), which is inconsistent with our serial smFISH results and previous studies (Lévesque  
235 and Parent, 2005; Roccaro-Waldmeyer et al., 2018). Accordingly, we conducted detailed cellular  
236 characterization of PV+ STN neurons. First, we performed triple smFISH for *Pvalb*, *Slc17a6*, and  
237 *Slc32a1*. We found that *Pvalb*+ neurons in the STN exclusively co-express glutamatergic marker  
238 *Slc17a6*, but not GABAergic marker *Slc32a1*, whereas those in the other brain areas such as  
239 hippocampus, cortex, and zona incerta co-express *Slc32a1* (**Figure 4B–D**; **Figure S8A**). Notably,  
240 quantitative analysis of the topographic distribution of *Pvalb*+ neurons indicated that  
241 glutamatergic PV+ neurons were particularly prevalent in the dorsolateral and middle STN  
242 (**Figure 4C, D**). Our serial multiplex-smFISH data provide direct evidence that PV+ STN cells are  
243 glutamatergic with topographic segregation in the STN (Hontanilla et al., 1998; Wu et al., 2018)  
244 and suggest that parvalbumin cannot reliably serve as a marker for GABAergic interneurons,  
245 together with previous findings (Jinno and Kosaka, 2004; Shang et al., 2015; Wallace et al.,  
246 2017).

247 To examine further physiological properties of PV+ STN neurons, we used PV-IRES-  
248 Cre::Ai6 mice expressing ZsGreen in PV+ cells. We first confirmed that PV+ neurons in the STN  
249 of these mice were immunohistochemically positive for glutamate and negative for GABA (**Figure**  
250 **5A**). By clearing parasagittal sections (2.5 mm in thickness) that embrace the entire STN without  
251 making physical cuts, we 3D-mapped total PV+ neurons in the STN and found topographically  
252 segregated distribution in the dorsolateral and middle STN, consistent with serial-smFISH data  
253 (**Figure 5B; Movie S2**). Because Parkinsonian symptoms are correlated with an increase in burst  
254 firing in STN neurons, we next recorded the firing patterns of glutamatergic PV+/- STN neurons  
255 using PV-IRES-Cre::Ai6 mice. Both PV+ and PV- neurons displayed similar spontaneous firing  
256 and other basic properties including input resistance (**Table S5**). However, only PV+ neurons  
257 showed phasic burst firing, which we refer to a firing pattern, composing of fast firing (an  
258 interspike interval, ISI, of less than 10 ms) and a pause; even current injection could not evoke  
259 bursts from PV- neurons (**Figure 5C-F; Figure S8B-E; Table S6; see STAR Methods**). Burst  
260 and tonic firing patterns were observed at an equivalent membrane potential range (-58 to -45  
261 mV) (**Figure S8E**), suggesting that burst firing was not due to differences in the membrane  
262 potential *per se*, even though firing patterns in STN neurons can be affected by membrane  
263 potentials (Kass and Mintz, 2006). Injection of negative current pulses evoked significantly  
264 smaller hyperpolarization-induced depolarizing sags in PV+ vs. PV- neurons, which was  
265 consistent with their burst properties (**Figure 5F**). Taken together, our results provide clear  
266 evidence that there are at least two functional types of glutamatergic neurons in the STN, and  
267 that glutamatergic PV+ neurons contribute to burst firing in the dorsolateral and middle STN. This  
268 is compatible with previous studies of spatial distribution of firing patterns by intraoperative  
269 microelectrode recording within the human STN showing the occurrence of burst firing in in the  
270 dorsal STN while tonic firings towards the ventral STN (Kaku et al., 2019).

271

272 **Cell type-dependent synaptic connectivity**

273 Our analysis defined new functional cell types and established wiregrams for the IP<sub>STN</sub> and  
274 HP<sub>STN</sub>, allowing us to refine our analysis of synaptic connectivity in the IP and HP to be cell type-  
275 specific. Thus, we tested whether the IP<sub>STN</sub> and HP<sub>STN</sub> form PV<sup>+/-</sup> cell-specific synaptic  
276 connections, and whether the HP<sub>GPe</sub> forms synapses on the two major GABAergic cell types in  
277 the GPe, that is, prototypic neurons projecting to the STN and arkypalidal neurons projecting to  
278 the striatum (Mallet et al., 2012; Mastro et al., 2014). By combining retrograde virus injections and  
279 mammalian GFP reconstitution across synapses (mGRASP) (Kato et al., 2014; Kim et al., 2012),  
280 which is an advanced method for accurately detecting synaptic connections, we mapped synaptic  
281 connectivity of these four cell-types in IP<sub>STN</sub>, HP<sub>STN</sub>, and HP<sub>GPe</sub> (**Figure 6A-F**; see **STAR**  
282 **Methods**). We identified synaptic connections in STN PV<sup>+</sup> and PV<sup>-</sup> neurons originating in both  
283 the IP<sub>STN</sub> and HP<sub>STN</sub>, by injecting AAV expressing the pre- and post-synaptic mGRASP  
284 components into the GPe (for IP<sub>STN</sub>), cortex (for HP<sub>STN</sub>), and STN, respectively. STN PV<sup>+/-</sup>  
285 neurons were distinguished by injection of AAV expressing iRFP in a Cre-dependent manner into  
286 the PV-Cre mouse line. We also observed synaptic connections in both GPe prototypic and  
287 arkypalidal neurons (labeled by a combination of retro-Lentivirus expressing iCre injected into the  
288 STN and STR, respectively, and AAV expressing Cre-On-postsynaptic mGRASP into the GPe)  
289 projecting from the HP<sub>GPe</sub> (labeled by injecting presynaptic mGRASP in the cortex). Our analysis  
290 revealed that axonal projections in both the STN and GPe from the IP<sub>STN</sub> and HP<sub>STN</sub>, and from the  
291 HP<sub>GPe</sub>, respectively, indeed serve as inputs. Furthermore, our results indicated that all four cell  
292 types in the STN and GPe (STN PV<sup>+</sup>, PV<sup>-</sup>, GPe arkypalidal, and prototypic neurons)  
293 communicate with each other and receive synaptic information from the cortex. Thus, in terms of  
294 cortex-GPe-STN circuitry, our data indicate that “everyone talks and everyone listens.” Next, in  
295 terms of connectivity patterns, the two types of STN neurons integrate excitatory and inhibitory  
296 signals (E/I) from the IP<sub>STN</sub> and HP<sub>STN</sub>. We examined the differential expression of glutamate and  
297 GABA receptors in STN PV<sup>+/-</sup> neurons. To this end, we performed serial triple smFISH for *Gria1*  
298 (encoding GluA1), *Gabra1* (GABA<sub>A</sub> α1 subunit), and *Pvalb*, and quantitatively compared their  
299 expression with respect to the topographically graded innervations of the IP<sub>STN</sub> and HP<sub>STN</sub> (**Figure**

300 **6G-I**). Our co-expression plot of *Gria1* and *Gabra1* showed a strong correlation between these  
301 genes, indicating that most STN neurons integrate both excitatory and inhibitory inputs at the  
302 single-cell level. Notably, the total expression levels of *Gria1* and *Gabra1* formed a gradient  
303 along the STN axis1 with higher and lower expression in the ventromedial and dorsolateral STN,  
304 respectively, similar to the expression pattern of *Slc17a6* (**Figure 4C, and 6H, I**). At the cellular  
305 level, the *Gria1* to *Gabra1* expression ratio was approximately similar in the dorsolateral PV+, but  
306 this expression ratio was significantly higher in ventromedial PV- neurons (**Figure 6I**). Taken  
307 together, our results indicate that two types of glutamatergic PV+/- STN neurons, which integrate  
308 information from both the IP<sub>STN</sub> and HP<sub>STN</sub>, and fire in different patterns, are segregated along a  
309 topographical distribution and express different ratios of genes encoding E/I receptors. Although  
310 further direct evidence is needed, these findings may represent a step forward in characterizing  
311 the E/I imbalance of BG circuits in Parkinson's disease models, as well as the effects of DBS.  
312 Interestingly, when we analyzed DBS results with respect to electrode position within specific  
313 STN structures from 26 Parkinson's disease patients who had received bilateral STN DBS  
314 implementation together with previous studies (Herzog et al., 2004; Mallet et al., 2012; Wodarg et  
315 al., 2012), we found that patients showing DBS-associated movement improvement had  
316 electrodes placed in the dorsolateral and middle STN, with somewhat greater improvement  
317 associated with electrode placement towards the middle of STN axis1 (**Figure S9**). This part of  
318 the STN has been reported to receive direct inputs from motor cortical areas and to contain PV+  
319 glutamatergic neurons (Alkemade et al., 2019; Eisenstein et al., 2014; Herzog et al., 2004;  
320 Lévesque and Parent, 2005; Mallet et al., 2007; Wodarg et al., 2012). The correlation among  
321 position-dependent STN DBS effects and connectivity patterns led us to hypothesize that distinct  
322 features of connectivity and cellular composition in the dorsolateral and middle STN influence the  
323 impact of DBS.

324 In Sum, our comprehensive profiling of circuit- and cellular-level connectivity of the  
325 indirect and hyperdirect pathways revealed a topographically graded organization with three  
326 convergent types of indirect and hyperdirect-pathway (GPe-only, STN-only, and both) in the STN.

327 Topographically distinct molecular, cellular, and physiological properties together with the circuit  
328 features imply functional computational complexity and delicate control. Our results suggest a  
329 complex interplay of information within the basal ganglia further on than the general consensus of  
330 parallel segregated input patterns with homogeneous cytoarchitecture and physiology. Our new  
331 view of the indirect and hyperdirect pathways, cytoarchitecture, and physiology properties  
332 substantially updates classical models and suggests, from a structural basis, a way to view  
333 relayed and integrated information flow underlying coordinated movement controls and STN DBS  
334 effects (**Figure 7**).

335 **Discussion**

336           Understanding how the STN controls motor functions, and identifying the circuit-level  
337 mechanisms underlying the effects of STN-DBS requires detailed convergent connectivity profiles  
338 for the main inhibitory and excitatory inputs in the STN. Furthermore, molecular profiles of cell  
339 types and neurotransmitter receptors in the STN are needed to infer the various interacting  
340 molecular and cellular processes that contribute to these mechanisms. In this study, we  
341 constructed a new comprehensive map of connectivity of the inhibitory indirect and excitatory  
342 hyperdirect pathways in the mouse and human STN. We identified glutamatergic PV+ STN  
343 neurons that show distinct burst firing patterns and topographical segregation in the dorsolateral  
344 and middle STN. Cell type-specific synaptic connectivity mapping revealed that both STN PV+  
345 and PV- neurons receive synaptic inputs from both the  $IP_{STN}$  and  $HP_{STN}$  and that both GPe  
346 prototypic and arkypalidal neurons receive synaptic inputs from the  $HP_{GPe}$ . Thus, “everyone talks,  
347 and everyone listens” in cortex-GPe-STN circuitry. These data provide new insights into the basic  
348 organization of the BG network and represent an anatomic and functional guide for further  
349 dissection of BG functions and DBS effects. Detailed knowledge regarding the anatomy and  
350 connectivity pattern of cortico-BG circuits is essential for understanding the psychomotor activity  
351 and pathophysiology associated with a wide range of neurological and neuropsychiatric diseases.

352           The cortex is widely considered to serve as the initial input to the BG through cortico-  
353 striatal pathways that convey sensorimotor, associative, and limbic information. The information  
354 from these three functional domains is thought to be transmitted to the downstream structures of  
355 the BG in a segregated manner, which supports the tripartite model (Lambert et al., 2012; Mallet  
356 et al., 2007; Parent and Hazrati, 1995; Plantinga et al., 2018). However, our data indicate that  
357 topographically graded organization exists in both the indirect and hyperdirect pathways in the  
358 STN, with continuum overlaps, an absence of anatomical boundaries, and direct cortico-pallidal  
359 connections. Although previous studies have demonstrated that the coexistence of clearly  
360 segregated and overlapping input patterns from the cortex to the BG (Draganski et al., 2008), in



361 the present study we constructed a large-scale map of the indirect and hyperdirect pathways,  
362 signifying a new understanding of input organization in the STN. In addition, our detailed analysis  
363 of direct cortico-pallidal connections together with recent findings regarding the complexity of the  
364 GPe (Abecassis et al., 2020; Mallet et al., 2012; Mastro et al., 2014, 2017) updates current views  
365 of the BG network, in which the GPe is considered to be a simple relay nucleus providing a  
366 unidirectional flow of information from the input structures (such as the striatum and STN) to the  
367 BG output structures (such as the GPi and SNr). These data, together with our single-cell  
368 reconstruction and cell type-specific synaptic connectivity analyses, suggest further complexity of  
369 BG functional organization through three types of information integration (**Figure 3H**), in addition  
370 to reciprocal and loop connections within the BG (Hegeman et al., 2016; Mallet et al., 2012). For  
371 instance, beyond the STN-GPe network, the hyperdirect pathway directly and/or collaterally  
372 innervates the STN and the striatum as well as two types of GABAergic GPe neurons (prototypic  
373 and arkypallidal), thus providing HP-driven feedforward inhibition. This circuit-level complexity  
374 implies the existence of anatomical substrates for precisely coordinated regulations of motor as  
375 well as nonmotor functions governed by the BG.

376 It is important to note that, as with any work, the present study has several potential  
377 limitations and strengths. First, at the mesoscopic level of mouse connectivity, projection signals  
378 labeled using cytosolic fluorescence proteins (FPs) include both axons from passing fibers and  
379 synaptic terminals. Like previous studies that found cytoplasmic FP signals to strongly  
380 correspond to synaptically-targeted FP signals after removing the axons of passage (Harris et al.,  
381 2019; Hunnicutt et al., 2016; Oh et al., 2014), we found no significant difference in the  
382 topographic organization of the indirect and hyperdirect pathways after removing the axons of  
383 fasciculated passing fibers observed in some areas i.e., the dorsal part of the GPe, and the  
384 anterior/posterior ends of the STN (**Figure S4E**; see **STAR Methods**). Second, to test the  
385 possibility that our discovery of a topographic gradient in the STN might be the product of graded  
386 injections, we examined a dataset showing overlapping axonal projections in the STN that were  
387 innervated from separate injections, so that no overlap in these injection sites could be

388 guaranteed. An additional statistical analysis confirmed that neighboring yet non-overlapping  
389 injections in different functional subregions led to overlapping projection patterns in the STN  
390 (**Figure S4F**). These results support the existence of graded organization in the STN, and  
391 challenge the previous models of clear segregation, such as the tripart model. Third, at the  
392 microscopic level, although mGRASP-assisted circuit mapping provided convincing data  
393 regarding the cell types in the STN and GPe that receive synaptic inputs from the indirect and  
394 hyperdirect pathways, further fine-scale mapping of the topographic organization of convergent  
395 synaptic connectivity is necessary. Finally, for assessing human connectivity, we used diffusion-  
396 weighted image (DWI)-based tractography. This method carries some degree of inherent  
397 ambiguity, such as that related to the validity of tract reconstruction and orientation (Maier-Hein et  
398 al., 2017; Petersen et al., 2019). However, substantial scientific innovations have aimed to  
399 overcome the limitations of this technique. Regardless, it is currently the only tool for mapping  
400 human brain connectivity *in vivo*, and the data regarding overlapping patterns were highly  
401 consistent with our mouse data, which were obtained using advanced and accurate techniques,  
402 as well as with data from previous reports (Plantinga et al., 2016). Overall, our data represent a  
403 translational comparison of connectivity patterns in the STN across species.

404 Previous studies suggested the existence of glutamatergic PV+ neurons in STN and their  
405 topographical organization at coarse level (Hontanilla et al., 1998; Roccaro-Waldmeyer et al.,  
406 2018; Wu et al., 2018) based on immunohistochemistry with anti-PV or indirect comparison of  
407 separate conventional *in situ* hybridization datasets for PV and vGluT2, which makes it difficult to  
408 map a precise topographic distribution of STN PV+ neurons. Here, we directly identified  
409 topographically localized glutamatergic PV+ neurons in the STN using serial multiplex smFISH.  
410 They are a main contributor to burst firing, which indicates a potential key role as generators and  
411 modulators of  $\beta$ -band (15-30 Hz) oscillations in the BG. As excess burst firing and  $\beta$ -band  
412 oscillations are signatures of Parkinson's disease and these pathophysiological activities are  
413 decreased by STN DBS therapy, these burst firing PV+ STN neurons may be implicated in  
414 Parkinson's disease symptoms (Kühn et al., 2004; Steigerwald et al., 2008). By mapping the

415 distributions of major excitatory and inhibitory transmitter receptors in the STN, we found distinct  
416 topographic patterns of expression level. These patterns suggest the existence of a functional  
417 layer of differential molecular and cellular receptibility on the top of neural connectivity.  
418 Interestingly, the E/I receptor expression ratio is equivalent in dorsolateral PV+ STN neurons, but  
419 higher in ventromedial PV- STN neurons. These results raise the important question of whether  
420 cell type-specific changes in E/I receptor expression emerge in dopamine-depleted states.  
421 Further studies designed to interrogate alterations in synaptic connectivity, receptor expression,  
422 and glutamatergic PV+ STN neuronal firing patterns in models of Parkinson's disease will provide  
423 important new insights regarding the coordinated regulation of specialized PV+ neurons in the BG  
424 network.

425 Our systematic connectivity maps, superimposed upon regions with distinct functional  
426 cellular heterogeneity, suggest a complex interplay of information within the BG. Our new view of  
427 the indirect and hyperdirect pathways (**Figure 7**) substantially updates classical models and  
428 proposes, from a structural basis, a new take on relayed and integrated information flow  
429 underlying coordinated movement controls and the effects of STN DBS. Further studies of other  
430 inputs (e.g. serotonergic and cholinergic) into the STN as well as its outputs will facilitate the  
431 elucidation of the mechanisms of the STN functions and complex effects of DBS.

432 **Acknowledgments**

433 We thank members of the Kim laboratory, cooperation, and technical assistance during the  
434 course of the investigation.

435

436

437 **Author Contributions**

438 H.L. performed mouse connectivity experiments and imaging. H.J. performed statistical analysis  
439 with mouse connectivity. D.K. and Z.-H.C. provided and analyzed human 7T MRI data. H.L. and  
440 Jiwon Kim performed in situ hybridization and immunohistochemistry. K.T.-Y. conducted and  
441 analyzed electrophysiological data. H.J., Jiwon Kim and L.F. analyzed molecular profiling data.  
442 H.P., Y.L. and S.H.P. performed DBS surgery and collected clinical data. H.J., W.C.O., H.P., and  
443 S.H.P. analyzed DBS data. H.L., H.J., D.K., Jiwon Kim., K.T.-Y., H.P., and Jinhyun Kim wrote the  
444 original draft. All of the authors reviewed the manuscript. H.L., H.J. and Jinhyun Kim conceived  
445 and designed the study.

446

447

448 **Competing Interest Statement**

449 Authors declare no competing interests.

450

451

452 **Funding**

453 This work was supported by Korea National Research Foundation (2017M3C7A1047392), Korea  
454 Institute of Science and Technology (KIST) institutional program (2E30971), National Research  
455 Foundation of Korea (NRF) grant funded by the Korea government (MSIP)  
456 (2017M3C7A1049026), and the Samsung Science and Technology Foundation (SSTF-BA1502-  
457 11).

## Figure Titles and Legends

**Figure 1. Graded topography of indirect pathway in STN.** **(A)** Pipeline of indirect pathway ( $IP_{STN}$ ) mapping data generation and processing. Scale bar, 250  $\mu\text{m}$ . **(B)** Spatial locations (left) and coverage (right) of the GPe injections ( $n = 55$ ). **(C)** Heatmap showing GPe inputs and  $IP_{STN}$  signal distribution for each injection experiment (rows) along anatomical axes (columns), sorted by the GPe injection centroid along the AP. **(D)** Illustration of STN geometric axis1 and axis2. **(E)** Heatmap of  $IP_{STN}$  and GPe inputs signal distribution, sorted by projection centroid along STN axis1. **(F)** Representative images of the GPe injection sites (left) and serial coronal images of corresponding  $IP_{STN}$  showing graded topographic organization along STN axis1 (right, top) and axis2 (right, bottom). Heatmap showing signal distribution for each slice along the white line, parallel to the corresponding STN axis. The distance from the bregma indicated at the corner. Scale bar, 250  $\mu\text{m}$ . **(G)** Left:  $IP_{STN}$  projection patterns (dots) plotted in a pattern space generated via multidimensional scaling (MDS). Right: dimensions 1 and 2 in the pattern space were significantly correlated with STN axis1 and axis2 (arrows in the MDS plot), respectively (right). **(H)** Topographic organization of the  $IP_{STN}$ . Left: GPe injection sites and  $IP_{STN}$  centroids superimposed onto coronal 3D views of the GPe and STN. Colors indicate the  $IP_{STN}$  centroid location along axis1, with the corresponding GPe inputs gradient direction (arrows). Right: correlations between GPe inputs and  $IP_{STN}$  along GPe gradient axes and STN axes. Correlations were calculated via Pearson's  $r$ .

**Figure 2. Graded topography of hyperdirect pathway in STN. (A)** Representative axonal projections in the STN ( $HP_{STN}$ ) from an MOp injection (inset) extracted from AMBCA datasets. Scale bar, 250  $\mu\text{m}$ . **(B)** Top: coverage (left) and spatial locations of the hyperdirect cortical injection site (right) across the isocortex ( $n = 176$ ). Bottom: Bar plot of STN projection power for each subregion, an estimated STN projection volume assuming the subregion is fully labelled, shown in log-scale. Grouped functional parts of cortical subregions are color-coded (See **Table S3** for functional classification). **(C)** Digitally reconstructed serial STN projection density patterns of the averaged  $HP_{STN}$  from each grouped functional part and constituting cortical subregion at 25- $\mu\text{m}$  intervals. The number in parentheses denotes the number of localized injections within the subregion. Subregions without localized injections are not shown. **(D)** Representative set of intra-subregion injections within the MO (top) and SS (bottom), and corresponding serial STN projection density at 50- $\mu\text{m}$  intervals. **(E)** Heatmap showing cortical inputs and  $HP_{STN}$  signal distribution along anatomical axes (columns). Cortical injection experiments (rows) were grouped into three functional parts and sorted according to the AP of the injection centroid in each group. **(F)** Left:  $HP_{STN}$  projection patterns in the pattern space (same as in **Figure 1G**). Right: Dimensions 1 and 2 in the  $HP_{STN}$  pattern space were also significantly correlated with STN axis1 and axis2 (arrows in the MDS plot). Correlations were calculated by Pearson's  $r$ .

**Figure 3. Complex integration of indirect and hyperdirect pathways in STN. (A)** Left: illustration of the hyperdirect pathway with a direct pallidal connection and schematic of the injection strategy for labelling collateral hyperdirect projections (retroAAV-iCre and Cre-dependent switch-on AAV-tdTomato were injected in the GPe and MOp, respectively). Right: z-projection image of a cleared parasagittal section (2.5 mm thick) showing hyperdirect projections both in the GPe and the STN, and the trajectories of the HP with two downstream targets (arrows). Scale bar, 250  $\mu$ m. **(B)** Heatmap showing cortical inputs and HP<sub>GPe</sub> signal distribution along anatomical axes (columns). Cortical injection experiments (rows) were grouped into three functional parts and sorted according to the AP of the injection centroid in each group. **(C)** Heatmap of sorted HP<sub>STN</sub> with cortical inputs and HP<sub>GPe</sub> signal distribution along the STN axis1 and corresponding cortex and GPe gradient axis. Rows are sorted by HP<sub>STN</sub> axial location along STN axis1. **(D)** Left: illustration of the topographic organization of the HP<sub>STN</sub>, HP<sub>GPe</sub>, and cortical inputs with STN geometric axes and corresponding gradient axes of the HP<sub>GPe</sub> and cortical inputs (arrows). Right: linear relationship between axial locations of the HP<sub>GPe</sub> (top), HP<sub>STN</sub> (bottom), and cortical inputs. **(E)** Topographic relationship between the IP and HP. Left: the projection similarity between IP<sub>STN</sub>-HP<sub>STN</sub> was inversely correlated with the distance between IP<sub>INPUT</sub>-HP<sub>GPe</sub>. Each dot represents a pair of IP and HP experiments ( $n = 55 \times 176$ ). Middle: Scatterplots of IP<sub>STN</sub> and HP<sub>STN</sub> density from three representative pairs showing similar (1), intermediate (2), and different (3) IP<sub>STN</sub> and HP<sub>STN</sub> projections. Right: Prediction of HP<sub>GPe</sub>-HP<sub>STN</sub> based on GPe input-IP<sub>STN</sub> topographic organization resulted in significantly lower mean squared error (MSE) compared with randomizations ( $***p < 0.001$ , two-sided Student t-test). Red error bars represent the mean with s.e.m, while the gray area represents the 5<sup>th</sup> to 95<sup>th</sup> percentile of randomization. **(F)** Left: Injection sites of retroAAV expressing tdTomato and sfGFP in the GPe (top) and STN (bottom), respectively. Right: Magnified image of the MOp showing labeled GPe (red)- and STN (green)-projecting cells in L5, with co-labeled (yellow) cells representing collateral GPe/STN-projecting neurons. Scale bar 1 mm and 100  $\mu$ m (enlarged view). **(G)** Analysis of single cell reconstruction data from the MouseLight database. Left: representative MOs neuron (AA0772) collaterally

projecting to the GPe and STN. Right: cortical neuronal population innervating the  $HP_{GPe}$  (64%),  $HP_{STN}$  (20%), and collaterally innervating the  $HP_{GPe/STN}$  (15%). **(H)** Schematic illustration of three types of signal integration in the STN from indirect and hyperdirect pathways. Correlations were calculated via Pearson's  $r$ .



**Figure 4. Glutamatergic STN PV+ neurons. (A)** Top: pipeline of serial smFISH data generation and processing. Bottom: example serial smFISH image of STN with the distance from the bregma indicated at the corner. **(B)** Left: example smFISH image of the STN (inset) from coronal brain slice with *Pvalb*, *Slc17a6*, and *Slc32a1*. Right: magnified views of the regions indicated by white boxes in the dorsolateral (top) and ventromedial (bottom) STN (left panel) show that STN neuronal population co-express *Pvalb* and *Slc17a6*, but not *Slc32a1*. Scale bar, 1 mm (left), 250  $\mu$ m (left, inset), and 10  $\mu$ m. **(C), (D)** Topographic distribution of glutamatergic PV+ neurons in the STN. Representative smFISH images cropped to show the STN (**C**, left), and quantification of cells expressing each gene along STN axis1 shown with the mean ( $n = 2$ ) and s.e.m. (**C**, right). The pseudocolor arrow represents STN axis1. Co-expression plot of *Pvalb* with *Slc17a6* (**D**, left) and *Slc32a1* (**D**, right), showing the number of mRNA puncta per cell for each gene. Each dot represents a cell, colored according to location along STN axis1. Dashed lines represent the thresholds for positive cells. Double negative cells are not shown. Scale bar, 250  $\mu$ m.

**Figure 5. Firing patterns of STN PV+/- neuron. (A)** Left: representative image of the STN (inset) from coronal brain slice of PV-IRES-Cre::Ai6 mouse line, showing PV+ neurons. Right: magnified immunofluorescence image of STN cells show STN PV+ neurons co-labeled with anti-Glutamate (top) but not with anti-GABA (bottom). Scale bar, 1 mm (left), and 250  $\mu$ m (left, inset) and 20  $\mu$ m (right). **(B)** Distribution of PV+ neurons in the STN using automatic cell detection from PV-IRES-Cre::Ai6 mouse. Scale bar, 250  $\mu$ m. **(C)** Electrophysiological properties of STN PV+/- neurons. Representative tonic (bottom) and burst (top) firing with enlarged traces shown in boxes, recorded from STN PV+/- neurons using the PV-IRES-Cre::Ai6 mouse line. Interspike interval (ISI) of first two, 2<sup>nd</sup> and 3<sup>rd</sup>, last two spikes, and average of all spikes shown in the boxes; 7.7, 5.9, 7.7, and 6.5 ms for PV+ burst firing; 50.3, 51.4, 46.7, and 47.5 ms for PV- tonic firing neuron. **(D)** ISI histogram of spontaneous firing patterns (burst PV+ and tonic PV+/- neurons, n = 12, 14, and 20, respectively). Insets in the top panels show magnified ISI histogram during 0-150 ms (shaded area). Bar graph shows the proportion of burst firing cells (right). **(E)** ISI histogram of firing patterns during a rebound depolarization following the removal of a hyperpolarizing current injection (left), and during depolarizing current injection (right; see **Methods**) **(F)** The hyperpolarization-induced depolarizing sag of PV+/- neurons, marked by an arrow (left), was significantly smaller than that in PV+ neurons (right). Data are mean  $\pm$  s.e.m. Mann-Whitney U test with p < 0.01. ISI of first two, 2<sup>nd</sup> and 3<sup>rd</sup>, last two spikes, and average of all spikes; 4.2, 3.5, 8.9, and 4.6 ms for PV+ burst firing, 12.4, 12.5, 55.1, 24.2 ms for PV- tonic firing neuron.

**Figure 6. Cell type-dependent synaptic connectivity.** **(A)** Scheme of tested cell type-specific connections in the HP<sub>GPe</sub> (1, 2), HP<sub>STN</sub> (3, 4), and IP<sub>STN</sub> (5, 6). **(B-E)**, Labeling strategies for testing synaptic connections listed in **(A)** using retrograde virus and mGRASP system. Presynaptic-mGRASP was injected into either the cortex (1–4) or the GPe (5–6). Projection-dependent GPe cell types (arkypallidal and prototypic) were labeled with retro-lenti virus expressing Cre in the Striatum and STN, respectively (1, 2), followed by Cre-ON postsynaptic-mGRASP in the GPe. A mixture of postsynaptic-mGRASP and Cre-ON fluorescent protein was injected into the STN of PV-IRES-Cre mice to distinguish STN PV<sup>±</sup> neurons (3–6). **(F)** Postsynaptic neurons (top) and enlarged image of dendrite (bottom), marked by white box. Green mGRASP signals along the dendrites of post-synaptic neurons (red) were detected in all tested sets, indicating the synaptic connections. Scale bar, 10  $\mu$ m (top), and 2  $\mu$ m (bottom). **(G)** Representative coronal smFISH image of the STN with *Pvalb*, *Gria1*, and *Gabra1*. Enlarged views of the regions indicated by white boxes in the dorsolateral (top) and ventromedial (bottom) STN (left panel) showing co-expression of *Gria1* and *Gabra1*. Scale bar, 1 mm (left), 250  $\mu$ m (left, inset) and 20  $\mu$ m (right). **(H)** Topographic distribution along STN axis1 of cells expressing *Gria1* and *Gabra1*. Quantification of cells expressing each gene along STN axis1 (left) and a co-expression plot (right) showing that most STN cells co-express *Gria1* and *Gabra1*. Data are represented as means (n = 6) with s.e.m. **(I)** Left: Relative expression level of *Gria1* and *Gabra1* in PV<sup>±</sup> neurons. Middle: *Gria1* to *Gabra1* ratio in PV<sup>±</sup> neurons exhibit distinct topographic pattern along STN axis1. Right: the *Gria1* to *Gabra1* ratio was significantly lower in STN PV<sup>±</sup> cells (permutation test, n = 10,000, \*\*\*\*p < 0.0001). Data are represented as means (n = 6) with s.e.m.

**Figure 7. Schematic of basal ganglia network with detailed topographic connectivity, cytoarchitecture, and firing pattern of the STN. (A)** Summary of connectivity, cellular and physiological profiles (top) and cell-type specific synaptic connectivity (bottom) of the STN. Topographical organization of three convergent types of indirect and hyperdirect pathways is represented in gradual color change and arrows. Representative traces of two firing patterns, burst and tonic firing, illustrate topographic distribution of functionally distinct cell-types along dorsolateral and ventromedial parts of the STN, respectively. **(B)** Schematic of basal ganglia network with updated circuit- and cellular-level connectivity found in this study (represented in colored line). Three convergent hyperdirect and indirect pathways related to the STN are shown in solid lines.

458

459 **STAR Methods**

460

461 **Mice**

462 C57BL/6J, PV-IRES-Cre (B6;129P2-Pvalb<sup>tm1(cre)Arbr</sup>/J, JAX stock no. 017320), Ai6 (B6.Cg-  
463 Gt(ROSA)26Sor<sup>tm6(CAG-ZsGreen1)Hze</sup>/J, JAX stock no. 007906), and double-transgenic PV-IRES-  
464 Cre::Ai6 mice were used in this study. While eight 10-week-old mice were used for most  
465 experiments, five 7-week-old mice were used for electrophysiology. All experiments were  
466 conducted in accordance with protocols approved by the Institutional Animal Care and Use  
467 Committee at the Korea Institute of Science and Technology and the National Institutes of Health  
468 guidelines for animal care and use.

469

470 **Stereotaxic injection**

471 Iontophoresis of recombinant adeno-associated virus (rAAV) vectors was performed by applying  
472 a positive current for 5 min using a Digital Midgard Precision Current Source (Stoelting). For  
473 indirect pathway mapping experiments, rAAV2/1.CAG.sfGFP.WPRE or  
474 rAAV2/1.CAG.tdTomato.WPRE (average titer from seven batches:  $1.7 \times 10^{13}$  vg/ml) was injected  
475 via a 3  $\mu$ A current into the GPe. Unilateral dual-injections were performed in 35 mice with a total  
476 of 55 injections (**Table S1**). For HP<sub>STN</sub> labeling, retroAAV-expressing iCre,  
477 rAAV2.CAG.iCre.WPRE packaged with a rAAV2-retro helper (Addgene, 51904 and 81070)(Kato  
478 et al., 2014; Tervo et al., 2016), was injected via a 5  $\mu$ A current into the STN of Ai6 mice. For  
479 other surgeries, pressure injections were performed at 20–40 nl per min using a Nanoliter injector  
480 and a Micro-4 syringe pump (World Precision Instruments). For cortico-pallidal pathway labeling,  
481 rAAV2/retro.CAG.iCre.WPRE and rAAV2/1.CAG.JxON.tdTomato.WPRE (100 nl each) were  
482 injected into the GPe and ipsilateral primary motor cortex (MOp). For cortico-pallidal pathway  
483 dissection, rAAV2/retro.CAG.sfGFP.WPRE and rAAV2/retro.CAG.tdTomato.WPRE (100 nl each)  
484 were injected into the STN and the GPe, respectively. For synaptic connectivity mapping,  
485 improved mGRASP (Kim et al., 2012) combined with a retro-Lenti system (Kato et al., 2014) or

486 transgenic mouse line was used. For mapping cell type-specific synaptic connectivity, pre- and  
487 post-synaptic mGRASP components were injected into the cortex/GPe and STN. mGRASP  
488 technology has been demonstrated to be an accurate synaptic detector and has been  
489 successfully employed in the mapping of fine-scale synaptic connectivity in multiple cell types in  
490 various circuits (Druckmann et al., 2014; Feng et al., 2014; Kim et al., 2012; Kwon et al., 2018;  
491 Mukherjee et al., 2020; Song et al., 2018). To validate synaptic connections in hyper-/indirect  
492 pathways using mGRASP, rAAV2/1.CAG.pre-mGRASP.iOLLAS.WPRE was injected into the  
493 MOp (600 nl) or GPe (400 nl), respectively. For post-mGRASP labeling specific to GPe cell types,  
494 50 nl of retroLenti/FuG-E.CAG.iCre.WPRE was injected into the striatum or STN, and 100 nl of  
495 rAAV2/1.CAG.JxON.post-mGRASP.2A.dTomato.WPRE (Addgene, 34913) was injected into the  
496 GPe. For post-mGRASP labeling specific to STN cell types, a mixture of rAAV2/1.CAG.post-  
497 mGRASP.2A.dTomato.WPRE (Addgene, 34912) and rAAV2/1.CAG.JxON.iRFP670.WPRE (4:1  
498 ratio) was injected into the STN of PV-IRES-Cre mice (50 nl). The following coordinates (in mm)  
499 were used for the GPe: -0.22 anteroposterior from bregma (AP), +2.0 mediolateral from bregma  
500 (ML), -3.5 dorsoventral from dura (DV); STN: -1.65 AP, +1.6 ML, -4.55 or -4.65 DV (for PV-IRES-  
501 Cre); MOp: +2.0 AP, +1.75, +2.0, and +2.25 ML, -0.8 and -0.9 DV; and striatum: +0.5 AP, +2.0  
502 ML, -3.0, -2.5, and -2.0 DV. The viral vectors were packaged using vector cores at the University  
503 of Pennsylvania or the University of North Carolina at Chapel Hill.

504

#### 505 **Tissue preparation**

506 Brains were prepared as previously described (Feng et al., 2014). For GABA  
507 immunofluorescence, 4% paraformaldehyde in 0.1M phosphate buffer with pH 7.4 (4% PFA)  
508 containing 0.3% glutaraldehyde was used for fixation. For immunofluorescence, 50- $\mu$ m sections  
509 were permeabilized in 1% Triton X-100 in tris-buffered saline (TBS) and blocked in 5% normal  
510 goat serum and 0.4% Triton X-100 in TBS. The sections were incubated with primary antibody  
511 for 1–2 days at 4 °C. After washing, the sections were incubated with secondary antibody for 2–3  
512 h at room temperature and counterstained with DAPI, except for in the mGRASP experiments.

513 Sections were mounted with mounting media (Invitrogen, Prolong Diamond Antifade or Vector  
514 Labs, VectaShield). In this study, we used the following antibodies: rat anti-OLLAS (Novus,  
515 NBP1-06713, 1:1000), guinea pig anti-NeuN (Sigma-Aldrich, ABN90P, 1:1000), rabbit anti-  
516 glutamate (Sigma-Aldrich, G6642, 1:500-1000), rabbit anti-GABA (Sigma-Aldrich, A2052, 1:500-  
517 1000), Alexa Fluor 488 goat anti-rabbit IgG (Invitrogen, A11008, 1:200), Alexa Fluor 555 goat  
518 anti-guinea pig IgG (Invitrogen, A21435, 1:200), Alexa Fluor 633 goat anti-rabbit IgG (Invitrogen,  
519 A21071, 1:500), and Alexa Fluor 633 goat anti-rat IgG (Invitrogen, A21094, 1:1000).

520 For tissue clearing, we modified the CLARITY method (Tomer et al., 2014). Briefly, PFA-  
521 fixed brains were cut as parasagittal sections (2.5 mm) containing the GPe and STN. The  
522 sections were incubated for at least 2 days in a hydrogel solution with the following composition  
523 (in %): 1 acrylamide, 4 PFA, and 0.25 VA-044 initiator in PBS. Following degassing and gel  
524 polymerization at 37 °C, the sections were incubated in SmartClear Clearing Buffer Type A  
525 (LifeCanvas Technologies) at 37 °C and in EasyIndex (LifeCanvas Technologies) at room  
526 temperature.

527

## 528 **Microscopy**

529 Wide-field images were obtained using an Axioscan Z1 slide scanner (Carl Zeiss Microscopy)  
530 equipped with a 20X 0.8 NA Plan-Apochromat air lens. Confocal images were acquired using an  
531 LSM 780 confocal microscope (Carl Zeiss Microscopy). mGRASP images were obtained at 0.6  
532  $\mu\text{m}$  depth intervals using a 40x 1.4 NA Plan Apochromat oil lens with a 2-fold digital zoom. For  
533 cleared tissue imaging, each sample was mounted with EasyIndex. Cleared brain images were  
534 acquired at 8.0  $\mu\text{m}$  depth intervals using a 20x 1.0 NA Plan-Neofluar optimized for CLARITY (Carl  
535 Zeiss Microscopy). Single-molecule fluorescence *in situ* hybridization (smFISH) images were  
536 acquired at 1 or 2  $\mu\text{m}$  depth intervals using a 40x 1.3 NA oil immersion lens.

537

## 538 **Indirect projection mapping pipeline**

539 The MATLAB (<https://www.mathworks.com>) version of the BaSiC (Peng et al., 2017) algorithm  
540 was applied to each fluorescent channel of image tiles (2040 px x 2040 px) using the default  
541 parameters for shading correction. Using a custom built GUI, image series were manually  
542 inspected for 1) missing or damaged tissue and 2) mispositioning, including flipping and rotation.  
543 Image series with severe artifacts in either the GPe or STN were consequently removed from the  
544 study. Human experts manually annotated the locations of the injection sites to encompass the  
545 cell bodies of labeled neurons, and a morphological operation was performed to generate a  
546 smooth binary injection mask. The injection volume of the filtered dataset ( $n = 55$ ) averaged  
547  $0.1403 \pm 0.0797 \text{ mm}^3$  ( $0.0546 \pm 0.031 \text{ mm}^3$  within the GPe).

548 The custom signal detection algorithm was applied to each image to extract positive  
549 signals from the background autofluorescence. The autofluorescence distribution of each image  
550 series was estimated from the non-signal regions contralateral to the injection site, and the mean  
551 was subsequently subtracted from the image. A median filter (3 x 3) was applied to reduce the  
552 noise. Candidate signal objects were first detected using the autofluorescence intensity profile  
553 and classified into three groups based on the intensity. Low- and medium-intensity objects were  
554 combined with the detection result from the edge detection filter ( $k_{\text{width}} = 10, 30$ ). The binary signal  
555 masks generated from the detection results were used to classify each pixel as either signal or  
556 background, and the density within a  $10 \mu\text{m} \times 10 \mu\text{m}$  grid was computed.

557 Images were first pre-aligned sequentially to minimize the inter-sectional difference in the  
558 DAPI signal. Stacked image volumes were aligned to the Allen Common Coordinate Framework  
559 (CCF v3) (Wang et al., 2020) via iterative 3D global and two-dimensional (2D) slice affine  
560 alignment using elastix (Klein et al., 2010). A population average model from 35 aligned volumes  
561 was generated following the Allen informatics data pipeline (Kuan et al., 2015), then registered to  
562 the CCF v3 using the Symmetric Normalization (SyN) transformation model (Avants et al., 2008)  
563 from Advanced Neuroimaging Tools (ANTs, <https://github.com/ANTsX/ANTs>). 3D deformable  
564 transformation from the population-averaged model to the CCF v3 was applied to each DAPI-  
565 based volume and the corresponding signal image was used to generate a  $25 \mu\text{m}$  isotropic 3D



566 registered volume. Injection and projection density signals within the GPe and STN were  
567 segmented using 3D region annotation from the Allen Mouse Brain Atlas and stored in a  
568 vectorized form. Signals in the GPe were downsampled to an isotropic voxel-size of 50  $\mu\text{m}$  to  
569 facilitate computation. Signal volumes were computed as the sum of the signal density within the  
570 target structure, multiplied by the voxel size.

571 To limit false positive projection signals, image series with (1) low injection or projection  
572 volume ( $< 0.001 \text{ mm}^3$ ) or (2) ectopic injections at the central nucleus of the amygdala (CeA) or  
573 substantia innominata (SI) were removed.

574

#### 575 **Hyperdirect projection data from the AMBCA**

576 Using the API for the Allen Mouse Brain Connectivity Atlas (AMBCA, [https://connectivity.brain-](https://connectivity.brain-map.org)  
577 [map.org](https://connectivity.brain-map.org)), we downloaded the dataset of isocortical injections with GPe or STN projections ( $n_{\text{gpe}} =$   
578  $1270$ ,  $n_{\text{stn}} = 851$ , at the time of our analysis). The voxel resolution for isotropic volume was set to  
579 50  $\mu\text{m}$  for injections and the GPe projection density, and 25  $\mu\text{m}$  for the STN projection density.  
580 Injection sites were inspected to remove experiments in which more than 10% of the injection  
581 volume was located outside the isocortex. The minimum projection volume for both the GPe and  
582 STN was set to  $0.001 \text{ mm}^3$ . We included nine transgenic Cre-lines with at least five datasets  
583 (Table S3) in addition to a dataset for wild-type C57BL/6J, which result in 176 datasets in total  
584 (181 for  $\text{HP}_{\text{STN}}$ ).

585 Trainable WEKA Segmentation ([http://fiji.sc/Trainable\\_Weka\\_Segmentation](http://fiji.sc/Trainable_Weka_Segmentation)) plugin for  
586 Fiji was used to identify and subtract passing fibers in the GPe and STN. The WEKA  
587 Segmentation model was trained using set of manually annotated labeled images containing  
588 labels for 1) densely populated thick fasciculated axon fibers, 2) fine axon projections, and 3)  
589 background. Among 86 datasets with densely populated projection signal (density  $> 0.5$ ) in GPe,  
590 25% were randomly selected for training dataset ( $n_{\text{train}} = 22$ ). Selection of filters and parameters  
591 were same as described in Hunnicutt *et al.* (Hunnicutt et al., 2016). After training, the classifier was  
592 applied to remaining dataset and generated a probability map for each label. To minimize the

593 artifacts from thick fasciculate fibers, conservative segmentation criteria was set to subtract as  
594 much passing fiber signal as possible. Default classification threshold was set to  $P_{fiber} > 0.25$  for  
595 fasciculated fiber, and  $P_{signal} > 0.7$  for axon signal classification. Custom built GUI in MATLAB was  
596 used to inspect the classification result, and to manually tune the segmentation threshold for each  
597 data if needed.

598

### 599 **Single-neuron reconstruction data from the MouseLight database**

600 Single neuron reconstruction data were obtained from the MouseLight database using Neuron  
601 Browser (<http://www.mouselight.janelia.org>). The search query was set to include only neurons  
602 for which the soma was located within the isocortex and any axonal structures were in either the  
603 GPe or STN (**Figure S5B**), which resulted in 142 reconstructed neurons. Neurons whose soma  
604 was located in the left hemisphere were mirrored onto the right hemisphere. Reconstructed  
605 neurons without ipsi-lateral projections to the GPe or STN were removed, and the remaining  
606 neurons ( $n = 69$ ) were classified by projection pattern: (1) IT types showing contralateral  
607 projections ( $n = 24/69$ ); (2) Collateral  $HP_{STN/GPe}$  ( $n = 10/69$ ); (3)  $HP_{STN}$  only ( $n = 15/69$ ); and (4)  
608  $HP_{GPe}$  only ( $n = 20/69$ ).

609 Normalized projection density was computed as the length of axons within the region  
610 normalized by the region volume. To visualize the topographical organization (Figure S5D), only  
611 neurons with axonal projections longer than 100  $\mu\text{m}$  in both the GPe and STN were shown.

612

### 613 **Analysis of mouse hyper/indirect pathway topographic organization**

614 The projection centroid was defined as the weighted centroid of the 3D density signal within a  
615 target region. The distance between two projections was measured using the pairwise cosine  
616 distance between two vectorized projections. STN geometric axis1 and axis2 were defined as the  
617 principal axis and its perpendicular, respectively, in a 2D projection of the STN along the AP axis.

618 For the signal distribution heatmap, reconstructed signals were digitally resliced along a  
619 designated axis and the fraction of signal volume within each slice to the total signal volume was

620 computed. The similarities between signal distributions were measured using the Pearson  
621 correlation between the signal centroid location along each direction.

622 We applied classical multi-dimensional scaling (MDS) (Kruskal and Wish, 1978) to  
623 visualize the pairwise projection distance relationships between STN projections in the “pattern  
624 space”. Robust Canonical Correlation Analysis (rCCA) (Branco et al., 2005) was performed to  
625 identify the graded topographic organization between the locations of each projection in the  
626 pattern space and the injection centroid in the anatomical space. MDS embeddings were then  
627 rotated so that the major axes corresponded to the canonical variates. Gradient axes in the cortex  
628 and the GPe corresponding to the STN geometric axes were computed via ridge regression on  
629 the STN projection centroid location along the gradient axis and input centroid coordinates.

630 Injections for which the majority (> 80%) of the injection volume was contained within the  
631 primary injection structure were classified as localized injections and used to investigate  
632 projection patterns from a single cortical subregion. Projection density signals from localized  
633 injections into the target structure were rescaled to [0, 1], then averaged to generate a  
634 characteristic projection. Note that the resulting characteristic projection may reflect only the  
635 spatial pattern of the projection, and its intensity may not be comparable to characteristic  
636 projections from other regions.

637 The projection power of a functional subregion, which represents an estimated projection  
638 volume assuming the subregion is fully labeled, was computed using non-negative ridge  
639 regression on the projection volume with the vector containing the injection volume within each  
640 subregion normalized by its volume, as a regressor.

641 The topographic relationship between  $IP_{STN}$ - $IP_{INPUT}$  was modeled using a multivariate  
642 linear model with the  $IP_{STN}$  centroid locations along two gradient axes as observations and the  
643  $IP_{INPUT}$  injection centroids as predictors. The same model was assessed using  $HP_{STN}$  centroids as  
644 inputs and  $HP_{GPe}$  centroids as targets. Error was measured according to the distance between the  
645 actual and predicted  $HP_{GPe}$  centroids. Permutation tests were used to compare the means of  
646 observed error against the error from 10,000 randomizations, where for each  $HP_{STN}$ , the

647 corresponding HP<sub>GPe</sub> was reassigned by shuffling. Two-sided t-tests were used to compare the  
648 means of the two groups.

649 In addition, to test whether nearby cortical injections targeting different functional  
650 subregions resulted in clearly segregated STN projection patterns, we measured the STN  
651 projection pattern distances between pairs of experiments using the following criteria: 1) the two  
652 injection volumes are localized within different functional tripartite cortical subregions; 2) the  
653 injection volumes exhibit no overlap in the reference space; 3) the distance between injection  
654 centroids is greater than 1 mm and less than 1.5 mm. We compared the distribution and mean of  
655 the STN projection distances from pairs of nearby injections targeting different subregions and  
656 pairs with the same input subregion using two-sided t-tests.

657

#### 658 **Serial Single-Molecule Fluorescence In Situ Hybridization**

659 Mouse brains were collected and immediately frozen in -80 °C 100% ethanol. Coronal sections  
660 (20 µm) containing the STN were collected using a cryostat (Leica) and mounted on SuperFrost  
661 microscope slides (FisherBrand). Serial smFISH was performed using the RNAscope multiplex  
662 fluorescent kit (ACD bio, 320850) according to the manufacturer's protocols. Brain sections were  
663 fixed in 4% PFA and dehydrated serially in ethanol (50%, 70%, 100%, and 100%). Sections were  
664 incubated in proteinase IV and rinsed with PBS. Probes were applied for 2 h at 40 °C and  
665 amplifiers 1–4 were subsequently applied at 40 °C. We used probes for *Aqp4* (catalog no.  
666 417161), *Gabra1* (435451), *Gria1* (421931), *Mbp* (451491), *Pvalb* (421931), *Rbfox3* (313311),  
667 *Slc17a6* (319171), *Slc32a1* (319191), and *Tmem119* (472901). Sections were counterstained  
668 with DAPI.

669 A nucleus detection pipeline, as previously described (Feng et al., 2019), was trained on  
670 30 images containing DAPI-stained cell nuclei (~180 per image) that were manually labeled by  
671 human experts. To detect mRNA puncta, we used a splitting strategy with a marker-controlled  
672 watershed approach and a variational Bayesian Gaussian mixture model (Feng et al., 2012). The

673 detected mRNA puncta were assigned to the nearest detected nuclei with a maximum distance of  
674 1  $\mu\text{m}$ .

675 Human experts manually registered each smFISH image section to a corresponding slice  
676 in Allen CCF v3, using a GUI that was custom designed in MATLAB, via rigid transformation  
677 (reflections, translation, and rotations). Support Vector Machine was then used to determine the  
678 threshold for positive cell classification. A classification model was trained on 30 randomly  
679 selected and manually labeled cells per image section, using the number, size, and intensity of  
680 puncta as the input.

681

### 682 **Electrophysiological recording**

683 Mice were anesthetized with halothane and transcardially perfused with an ice-cold dissection  
684 solution containing (in mM): 228 Sucrose, 2.5 KCl, 7 MgSO<sub>4</sub>, 0.5 CaCl<sub>2</sub>, 1.25 NaH<sub>2</sub>PO<sub>4</sub>, 26  
685 NaHCO<sub>3</sub>, and 11 glucose, oxygenated with 95% O<sub>2</sub> and 5% CO<sub>2</sub>. The brains were quickly  
686 removed and parasagittal slices (250  $\mu\text{m}$ ) containing the STN were prepared using a vibratome  
687 (Leica VT 1200S) in cold dissection solution. Slices were then transferred into extracellular  
688 solution containing (in mM): 125 NaCl, 2.5 KCl, 1.3 MgSO<sub>4</sub>, 2.5 CaCl<sub>2</sub>, 1.25 NaH<sub>2</sub>PO<sub>4</sub>, 26  
689 NaHCO<sub>3</sub>, and 11 glucose, oxygenated with 95% O<sub>2</sub> and 5% CO<sub>2</sub>, in which they were constantly  
690 kept before being moved to the recording chamber which also contained the extracellular  
691 solution. Chemicals for electrophysiological analyses were obtained from Sigma or Wako Pure  
692 Chemical Industries unless otherwise specified.

693 Whole-cell patch clamp recordings were made from ZsGreen-positive or ZsGreen-  
694 negative neurons in the STN of PV-IRES-Cre::Ai6 mice. Patch pipettes (resistance 5-6 M $\Omega$ ) were  
695 filled with a solution containing (in mM): 130 potassium gluconate, 2 NaCl, 4 MgCl<sub>2</sub>, 4 Na<sub>2</sub>ATP,  
696 0.4 NaGTP, 20 HEPES (pH 7.2), and 0.25 EGTA. Recordings in the cell-attached configuration  
697 were sometimes conducted before making whole-cell recordings. Neurons in the STN were  
698 visualized directly using a BX61WI microscope (Olympus), and those expressing ZsGreen were  
699 identified by a FV1000 confocal microscope (Olympus). Membrane potentials were recorded in

700 current-clamp mode either without current injection, or by giving depolarizing (100 pA) or  
701 hyperpolarizing (-200 pA) current steps for 500 ms, using a Multiclamp 700B amplifier and  
702 pClamp software (Molecular Devices). Data were accepted if the input membrane resistance was  
703 > 100 M $\Omega$ , firing action potentials had an amplitude of at least 50 mV, and the  
704 afterhyperpolarizing potential was < -50 mV. Analyses of electrophysiological parameters were  
705 performed using OriginPro (<https://www.originlab.com>) and Clampex  
706 (<https://www.moleculardevices.com>) software. The peak of afterhyperpolarizing potential was  
707 considered as membrane potential during firing. The parameter values for action potentials were  
708 equivalent to a previous study (Beurrier et al., 1999). Statistical significance was evaluated using  
709 the Mann-Whitney U test. In this study, to examine two neuronal firing patterns (tonic and burst  
710 firing), we classified burst firing according to the presence of, at least, one of the following firing  
711 patterns in three sequential recording conditions: 1) When recording without current injection,  
712 spontaneous firing shows fast burst firing (< 10 ms inter-spike intervals, ISI, on average) followed  
713 by a pause. Similar to the previously reported burst firing in the STN (Beurrier et al., 1999; Huang  
714 et al., 2017; Kass and Mintz, 2006), the membrane potential tends to be depolarized during burst  
715 firing, and tends to be drastically hyperpolarized at the start of a pause; 2) when recording during  
716 a 250-ms period of rebound depolarization following the removal of a hyperpolarizing current  
717 injection (-200 pA), the firing frequency is fast (< 10 ms ISI on average) and the membrane  
718 potential tends towards depolarization, followed by drastic hyperpolarization (> 15 pA) and  
719 quiescence of firing; 3) when recording during a 500-ms depolarizing current injection (100 pA),  
720 the firing frequency is fast (< 10 ms ISI on average) and the membrane potential tends towards  
721 depolarization at the beginning of a depolarizing current injection, followed by quiescence of firing  
722 for more than 50 ms (e.g., the top-right trace in **Figure S9C**). The firing properties used for this  
723 classification were compared between burst PV+, tonic PV+, and tonic PV- neurons. We noted  
724 that the properties of burst firing neurons generally differed from those of tonic firing neurons and  
725 that there was a clear tendency for firing to slow down during bursts, as reflected by the  
726 significant difference between the first or second ISI and the last ISI.

727

## 728 **Human 7T-DTI tractography**

729 T2\*-weighted imaging (T2\*WI) with 0.2 mm in-plane resolution and diffusion-weighted imaging  
730 (DWI) along 64 directions with a b-value of 2000 s/mm<sup>2</sup> and b0 with 1.8 mm isotropic resolution  
731 were obtained from a healthy 30-year-old adult male using a 7.0T MRI scanner (Magnetom,  
732 Siemens) and a homemade 8-channel radiofrequency head coil (Gachon University) (Cho et al.,  
733 2014). A 3D T1-weighted whole brain scan was obtained for anatomical reference using a 3.0T  
734 MRI scanner (Magnetom Verio, Siemens).

735 The DWI data were preprocessed to correct geometric distortions (Oh et al., 2012).  
736 Axonal fiber orientation information was calculated using a constrained spherical deconvolution-  
737 based diffusion model in the MRtrix3 toolbox (<https://www.mrtrix.org>) (Tournier et al., 2010).  
738 Whole-brain streamline tractography was performed using the probabilistic algorithm, iFOD1, as  
739 implemented in the MRtrix3 and visualized by track-density imaging (TDI) (Calamante et al.,  
740 2010) with a 0.2 mm isotropic resolution. Stacked T2\*-WIs were interpolated to an isotropic 0.2  
741 mm resolution and then co-registered to the b0 volume image of the DWI data using SPM12  
742 (<https://www.fil.ion.ucl.ac.uk/spm/software>). The regions-of-interest, including the STN and GPe,  
743 were manually traced using the MRtrix3, and the 3D Slicer (<http://www.slicer.org>) was used for  
744 3D modeling. T1-images were registered to the b0 volume image of DWI scans via affine  
745 transformation and annotated using the human Brainnetome atlas (Fan et al., 2016), mapped  
746 using FreeSurfer (<http://surfer.nmr.mgh.harvard.edu>).

747 Probabilistic constrained spherical deconvolution-based fiber tracking was performed  
748 using the iFOD2 algorithm (Oh et al., 2012). Optimal parameters were determined such that the  
749 resulting streamlines were visually similar to the combined subset of streamlines filtered  
750 according to anatomical constraints (Desmond et al., 1995). An additional five parameter  
751 combinations with values close to the selected parameters were also used. Whole-track and end-  
752 point TDI maps were computed using tracks that terminated within the STN.

753 The normalized average density of tracks in a region was defined as the average track  
754 intensity of all voxels within the TDI map of the target subregion. The spatial overlap was defined

755 as  $\frac{\sum_{|A \cap B|} \min(A_i, B_j)}{\sum_{|A \cup B|} \max(A_i, B_j)}$ , where  $A_i$  and  $B_j$  are the voxel intensities from two subregions.

756

### 757 **Human deep brain stimulation**

758 This study included 26 patients who received bilateral STN DBS implantation between March  
759 2005 and December 2008 at the Movement Disorder Center of Seoul National University Hospital  
760 (SNUH). The criteria were electrical stimulation of the left STN with a mono-polar electrode  
761 configuration and follow-up period of more than 3 years.

762 Pre-operative MRI images were obtained using a 1.5 T Signa MRI system (General  
763 Electric Medical Systems). STN DBS implantation was performed using a Leksell frame and  
764 SurgiPlan with microelectrode recording and macro-stimulation under local anesthesia, as  
765 previously described (Kim et al., 2009, 2010). The dorsolateral portion of the STN was targeted  
766 using MRI images, with theoretical STN coordinates (4 mm anterior from the midcommissural  
767 point, 10–12 mm lateral from the midline, and 3–4 mm below the intercommissural line).  
768 Permanent DBS electrode (Medtronic, DBS 3389) placement was determined to avoid damage to  
769 adjacent vessels, ventricles, and sulci.

770 Three-dimensional spiral stereotactic CT scans (Philips, Brilliance CT 64-channel) with 1  
771 mm thick slices were taken more than 1 month after surgery as previously described (Paek et al.,  
772 2008). The post-operative CT images were co-registered to pre-operative MRI images that were  
773 normalized to the ICBM 152 2009b nonlinear asymmetric T2 template (Fonov et al., 2011). The  
774 electrode trajectories were pre-reconstructed from post-operative CT images and manually  
775 adjusted. All normalization and registration processes were done using Lead-DBS (Horn and  
776 Kühn, 2015). Electrode trajectories were plotted onto images from the Schaltenbrand and  
777 Wahren human brain atlas for 2D visualization (Schaltenbrand and Wahren, 1998).



778 Neurologists evaluated the patients using the Unified Parkinson Disease Rating Scale  
779 (UPDRS) before and at 12, 24, 36, and 60 (if applicable) months after surgery. Motor symptom  
780 improvement was measured as a post-operative change in the summed UPDRS motor score  
781 (UPDRS III) of the right limb.

782

### 783 **Data Availability**

784 The datasets generated and analyzed supporting the findings of this study are available from the  
785 corresponding author upon reasonable request.

786

### 787 **Code availability**

788 Custom code used in this study are available from the corresponding author upon request.

789

790

### 791 **Supplemental Information**

792 **9** Figures; **6** Tables; **2** Movies

793

| <b>Data</b> | <b>Title</b>                                                              | <b>Related to</b> |
|-------------|---------------------------------------------------------------------------|-------------------|
| Figure. S1  | Mesoscale connectivity data processing pipeline                           | Figure 1          |
| Figure. S2  | Overview of individual indirect pathway dataset                           | Figure 1          |
| Figure. S3  | Graded topographic organization of indirect pathway                       | Figure 1          |
| Figure. S4  | Characteristics of hyperdirect pathway dataset                            | Figure 2          |
| Figure. S5  | Topographic organization of hyperdirect pathway                           | Figure 3          |
| Figure. S6  | Topographic analysis of human hyperdirect pathway using 7T-MRI            | Figure 3          |
| Figure. S7  | Cellular composition of the STN by serial-smFISH                          | Figure 4          |
| Figure. S8  | Electrophysiological properties of STN PV+ neurons                        | Figure 5          |
| Figure. S9  | Electrode position-dependent therapeutical effects in clinical DBS trials | Main text         |
| Table S1    | GPe injection summary                                                     | Figure 1          |
| Table S2    | Abbreviations                                                             | Figure 2          |
| Table S3    | List of transgenic Cre-lines used for hyperdirect pathway                 | Figure 2          |
| Table S4    | 7T-MRI parameters                                                         | Figure 3          |
| Table S5    | Electrophysiological parameters of STN PV+/- neurons                      | Figure 5          |

|          |                                                                                                        |          |
|----------|--------------------------------------------------------------------------------------------------------|----------|
| Table S6 | Firing properties of burst and tonic firing neurons                                                    | Figure 5 |
| Movie S1 | Aligned and registered 3D reconstructed whole brain slices using optimized mesoscopic mapping pipeline | Figure 1 |
| Movie S2 | High resolution imaging and reconstruction of cleared STN of PV-IRES-Cre::Ai6 mice                     | Figure 5 |

794

## References

- 795 Abecassis, Z.A., Berceau, B.L., Win, P.H., García, D., Xenias, H.S., Cui, Q., Pamukcu, A.,  
796 Cherian, S., Hernández, V.M., Chon, U., et al. (2020). Npas1+-Nkx2.1+ Neurons Are an Integral  
797 Part of the Cortico-pallido-cortical Loop. *J Neurosci* *40*, 743–768.
- 798 Alkemade, A., and Forstmann, B.U. (2014). Do we need to revise the tripartite subdivision  
799 hypothesis of the human subthalamic nucleus (STN)? *Neuroimage* *95*, 326–329.
- 800 Alkemade, A., Hollander, G. de, Miletic, S., Keuken, M.C., Balesar, R., Boer, O. de, Swaab, D.F.,  
801 and Forstmann, B.U. (2019). The functional microscopic neuroanatomy of the human subthalamic  
802 nucleus. *Brain Struct Funct* *224*, 3213–3227.
- 803 Avants, B.B., Epstein, C.L., Grossman, M., and Gee, J.C. (2008). Symmetric diffeomorphic image  
804 registration with cross-correlation: Evaluating automated labeling of elderly and  
805 neurodegenerative brain. *Med Image Anal* *12*, 26–41.
- 806 Benabid, A.L., Chabardes, S., Mitrofanis, J., and Pollak, P. (2009). Deep brain stimulation of the  
807 subthalamic nucleus for the treatment of Parkinson's disease. *Lancet Neurology* *8*, 67–81.
- 808 Bergman, H., Wichmann, T., and DeLong, M. (1990). Reversal of experimental parkinsonism by  
809 lesions of the subthalamic nucleus. *Science* *249*, 1436–1438.
- 810 Beurrier, C., Congar, P., Bioulac, B., and Hammond, C. (1999). Subthalamic Nucleus Neurons  
811 Switch from Single-Spike Activity to Burst-Firing Mode. *J Neurosci* *19*, 599–609.
- 812 Bevan, M.D. (2017). Chapter 14 The Subthalamic Nucleus. *Handb Behav Neurosci* *24*, 277–291.
- 813 Branco, J.A., Croux, C., Filzmoser, P., and Oliveira, M.R. (2005). Robust canonical correlations:  
814 A comparative study. *Computation Stat* *20*, 203–229.
- 815 Calamante, F., Tournier, J.-D., Jackson, G.D., and Connelly, A. (2010). Track-density imaging  
816 (TDI): Super-resolution white matter imaging using whole-brain track-density mapping.  
817 *Neuroimage* *53*, 1233–1243.
- 818 Cho, Z.-H., Calamante, F., and Chi, and J.-G. (2014). 7.0 Tesla MRI Brain White Matter Atlas  
819 (Springer).
- 820 Chu, H.-Y., McIver, E.L., Kovalski, R.F., Atherton, J.F., and Bevan, M.D. (2017). Loss of  
821 Hyperdirect Pathway Cortico-Subthalamic Inputs Following Degeneration of Midbrain Dopamine  
822 Neurons. *Neuron* *95*, 1306-1318.e5.
- 823 Cobos, I., Calcagnotto, M.E., Vilaythong, A.J., Thwin, M.T., Noebels, J.L., Baraban, S.C., and  
824 Rubenstein, J.L.R. (2005). Mice lacking *Dlx1* show subtype-specific loss of interneurons, reduced  
825 inhibition and epilepsy. *Nat Neurosci* *8*, 1059–1068.
- 826 DeLong, M.R., and Wichmann, T. (2015). Basal Ganglia Circuits as Targets for Neuromodulation  
827 in Parkinson Disease. *Jama Neurol* *72*, 1354–1360.
- 828 del Pino, I., García-Frigola, C., Dehorter, N., Brotons-Mas, J.R., Alvarez-Salvado, E.,  
829 Martínez de Lagrán, M., Ciceri, G., Gabaldón, M.V., Moratal, D., Dierssen, M., et al. (2013).

- 830 Erbb4 Deletion from Fast-Spiking Interneurons Causes Schizophrenia-like Phenotypes. *Neuron*  
831 79, 1152–1168.
- 832 Desmond, J.E., Sum, J.M., Wagner, A.D., Demb, J.B., Shear, P.K., Glover, G.H., Gabrieli, J.D.E.,  
833 and Morrell, M.J. (1995). Functional MRI measurement of language Lateralization in Wada-tested  
834 patients. *Brain* 118, 1411–1419.
- 835 Draganski, B., Kherif, F., Klöppel, S., Cook, P.A., Alexander, D.C., Parker, G.J.M., Deichmann, R.,  
836 Ashburner, J., and Frackowiak, R.S.J. (2008). Evidence for Segregated and Integrative  
837 Connectivity Patterns in the Human Basal Ganglia. *J Neurosci* 28, 7143–7152.
- 838 Druckmann, S., Feng, L., Lee, B., Yook, C., Zhao, T., Magee, J.C., and Kim, J. (2014). Structured  
839 Synaptic Connectivity between Hippocampal Regions. *Neuron* 81, 629–640.
- 840 Eisenstein, S.A., Koller, J.M., Black, K.D., Campbell, M.C., Lugar, H.M., Ushe, M., Tabbal, S.D.,  
841 Karimi, M., Hershey, T., Perlmutter, J.S., et al. (2014). Functional anatomy of subthalamic  
842 nucleus stimulation in Parkinson disease. *Ann Neurol* 76, 279–295.
- 843 Fan, K.Y., Baufreton, J., Surmeier, D.J., Chan, C.S., and Bevan, M.D. (2012). Proliferation of  
844 External Globus Pallidus-Subthalamic Nucleus Synapses following Degeneration of Midbrain  
845 Dopamine Neurons. *J Neurosci* 32, 13718–13728.
- 846 Fan, L., Li, H., Zhuo, J., Zhang, Y., Wang, J., Chen, L., Yang, Z., Chu, C., Xie, S., Laird, A.R., et  
847 al. (2016). The Human Brainnetome Atlas: A New Brain Atlas Based on Connectional  
848 Architecture. *Cereb Cortex* 26, 3508–3526.
- 849 Feng, L., Zhao, T., and Kim, J. (2012). Improved synapse detection for mGRASP-assisted brain  
850 connectivity mapping. *Bioinformatics* 28, i25–i31.
- 851 Feng, L., Kwon, O., Lee, B., Oh, W.C., and Kim, J. (2014). Using mammalian GFP reconstitution  
852 across synaptic partners (mGRASP) to map synaptic connectivity in the mouse brain. *Nat Protoc*  
853 9, 2425–2437.
- 854 Feng, L., Song, J.H., Kim, J., Jeong, S., Park, J.S., and Kim, J. (2019). Robust Nucleus Detection  
855 With Partially Labeled Exemplars. *IEEE Access* 7, 162169–162178.
- 856 Fonov, V., Evans, A.C., Botteron, K., Almli, C.R., McKinstry, R.C., Collins, D.L., and Group, the  
857 B.D.C. (2011). Unbiased average age-appropriate atlases for pediatric studies. *Neuroimage* 54,  
858 313–327.
- 859 Gradinaru, V., Mogri, M., Thompson, K.R., Henderson, J.M., and Deisseroth, K. (2009). Optical  
860 Deconstruction of Parkinsonian Neural Circuitry. *Science* 324, 354–359.
- 861 Group, D.-B.S. for P.D.S. (2001). Deep-Brain Stimulation of the Subthalamic Nucleus or the Pars  
862 Interna of the Globus Pallidus in Parkinson's Disease. *New Engl J Medicine* 345, 956–963.
- 863 Harris, J.A., Mihalas, S., Hirokawa, K.E., Whitesell, J.D., Choi, H., Bernard, A., Bohn, P.,  
864 Caldejon, S., Casal, L., Cho, A., et al. (2019). Hierarchical organization of cortical and thalamic  
865 connectivity. *Nature* 575, 195–202.

- 866 Hashimoto, T., Elder, C.M., Okun, M.S., Patrick, S.K., and Vitek, J.L. (2003). Stimulation of the  
867 Subthalamic Nucleus Changes the Firing Pattern of Pallidal Neurons. *J Neurosci* 23, 1916–1923.
- 868 Hegeman, D.J., Hong, E.S., Hernández, V.M., and Chan, C.S. (2016). The external globus  
869 pallidus: progress and perspectives. *Eur J Neurosci* 43, 1239–1265.
- 870 Hemptinne, C. de, Swann, N.C., Ostrem, J.L., Ryapolova-Webb, E.S., Luciano, M.S., Galifianakis,  
871 N.B., and Starr, P.A. (2015). Therapeutic deep brain stimulation reduces cortical phase-amplitude  
872 coupling in Parkinson's disease. *Nat Neurosci* 18, 779–786.
- 873 Herzog, J., Fietzek, U., Hamel, W., Morsnowski, A., Steigerwald, F., Schrader, B., Weinert, D.,  
874 Pfister, G., Müller, D., Mehdorn, H.M., et al. (2004). Most effective stimulation site in subthalamic  
875 deep brain stimulation for Parkinson's disease. *Movement Disord* 19, 1050–1054.
- 876 Hontanilla, B., Parent, A., Heras, S. de las, and Giménez-Amaya, J.M. (1998). Distribution of  
877 calbindin D-28k and parvalbumin neurons and fibers in the rat basal ganglia. *Brain Res Bull* 47,  
878 107–116.
- 879 Horn, A., and Kühn, A.A. (2015). Lead-DBS: A toolbox for deep brain stimulation electrode  
880 localizations and visualizations. *Neuroimage* 107, 127–135.
- 881 Hu, H., Gan, J., and Jonas, P. (2014). Fast-spiking, parvalbumin<sup>+</sup> GABAergic interneurons: From  
882 cellular design to microcircuit function. *Science* 345, 1255–1263.
- 883 Huang, C.-S., Wang, G.-H., Tai, C.-H., Hu, C.-C., and Yang, Y.-C. (2017). Antiarrhythmics cure  
884 brain arrhythmia: The imperativeness of subthalamic ERG K<sup>+</sup> channels in parkinsonian  
885 discharges. *Sci Adv* 3, e1602272.
- 886 Hunnicutt, B.J., Jongbloets, B.C., Birdsong, W.T., Gertz, K.J., Zhong, H., and Mao, T. (2016). A  
887 comprehensive excitatory input map of the striatum reveals novel functional organization. *Elife* 5,  
888 e19103.
- 889 Jinno, S., and Kosaka, T. (2004). Parvalbumin is expressed in glutamatergic and GABAergic  
890 corticostriatal pathway in mice. *J Comp Neurol* 477, 188–201.
- 891 Kaku, H., Ozturk, M., Viswanathan, A., Shahed, J., Sheth, S., Kumar, S., and Ince, N.F. (2019).  
892 Unsupervised Clustering Reveals Spatially Varying Single Neuronal Firing Patterns in the  
893 Subthalamic Nucleus of Patients with Parkinson's Disease. *Clin Park Relat Disord* 3, 100032.
- 894 Karube, F., Takahashi, S., Kobayashi, K., and Fujiyama, F. (2019). Motor cortex can directly drive  
895 the globus pallidus neurons in a projection neuron type-dependent manner in the rat. *Elife* 8,  
896 e49511.
- 897 Kass, J.I., and Mintz, I.M. (2006). Silent plateau potentials, rhythmic bursts, and pacemaker firing:  
898 Three patterns of activity that coexist in quadristable subthalamic neurons. *P Natl Acad Sci Usa*  
899 103, 183–188.
- 900 Kato, S., Kobayashi, K., and Kobayashi, K. (2014). Improved transduction efficiency of a lentiviral  
901 vector for neuron-specific retrograde gene transfer by optimizing the junction of fusion envelope  
902 glycoprotein. *J Neurosci Meth* 227, 151–158.

- 903 Keuken, M.C., Uylings, H.B.M., Geyer, S., Schäfer, A., Turner, R., and Forstmann, B.U. (2012).  
904 Are there three subdivisions in the primate subthalamic nucleus? *Front Neuroanat* 6, 14.
- 905 Kim, H., Paek, S.H., Kim, J., Lee, J., Lim, Y.H., Kim, D.G., and Jeon, B.S. (2009). Two-year  
906 follow-up on the effect of unilateral subthalamic deep brain stimulation in highly asymmetric  
907 Parkinson's disease. *Movement Disord* 24, 329–335.
- 908 Kim, H.-J., Jeon, B.S., Paek, S.H., Lee, J.-Y., Kim, H.J., Kim, C.K., and Kim, D.G. (2010).  
909 Bilateral Subthalamic Deep Brain Stimulation in Parkinson Disease Patients With Severe Tremor.  
910 *Neurosurgery* 67, 626–632.
- 911 Kim, H.-J., Jeon, B.S., and Paek, S.H. (2015). Nonmotor Symptoms and Subthalamic Deep Brain  
912 Stimulation in Parkinson's Disease. *J Mov Disord* 8, 83–91.
- 913 Kim, J., Zhao, T., Petralia, R.S., Yu, Y., Peng, H., Myers, E., and Magee, J.C. (2012). mGRASP  
914 enables mapping mammalian synaptic connectivity with light microscopy. *Nat Methods* 9, 96–102.
- 915 Kita, T., and Kita, H. (2012). The Subthalamic Nucleus Is One of Multiple Innervation Sites for  
916 Long-Range Corticofugal Axons: A Single-Axon Tracing Study in the Rat. *J Neurosci* 32, 5990–  
917 5999.
- 918 Klein, S., Staring, M., Murphy, K., Viergever, M.A., and Pluim, J.P.W. (2010). elastix: A Toolbox  
919 for Intensity-Based Medical Image Registration. *IEEE T Med Imaging* 29, 196–205.
- 920 Kopell, B.H., Rezai, A.R., Chang, J.W., and Vitek, J.L. (2006). Anatomy and physiology of the  
921 basal ganglia: Implications for deep brain stimulation for Parkinson's disease. *Movement Disord*  
922 21, S238–S246.
- 923 Kruskal, J., and Wish, M. (1978). *Multidimensional Scaling*.
- 924 Kuan, L., Li, Y., Lau, C., Feng, D., Bernard, A., Sunkin, S.M., Zeng, H., Dang, C., Hawrylycz, M.,  
925 and Ng, L. (2015). Neuroinformatics of the Allen Mouse Brain Connectivity Atlas. *Methods* 73, 4–  
926 17.
- 927 Kühn, A.A., Williams, D., Kupsch, A., Limousin, P., Hariz, M., Schneider, G., Yarrow, K., and  
928 Brown, P. (2004). Event-related beta desynchronization in human subthalamic nucleus correlates  
929 with motor performance. *Brain* 127, 735–746.
- 930 Kwon, O., Feng, L., Druckmann, S., and Kim, J. (2018). Schaffer collateral inputs to CA1  
931 excitatory and inhibitory neurons follow different connectivity rules. *J Neurosci* 38, 0155–18.
- 932 Lambert, C., Zrinzo, L., Nagy, Z., Lutti, A., Hariz, M., Foltynie, T., Draganski, B., Ashburner, J.,  
933 and Frackowiak, R. (2012). Confirmation of functional zones within the human subthalamic  
934 nucleus: Patterns of connectivity and sub-parcellation using diffusion weighted imaging.  
935 *Neuroimage* 60, 83–94.
- 936 Lambert, C., Zrinzo, L., Nagy, Z., Lutti, A., Hariz, M., Foltynie, T., Draganski, B., Ashburner, J.,  
937 and Frackowiak, R. (2015). Do we need to revise the tripartite subdivision hypothesis of the  
938 human subthalamic nucleus (STN)? Response to Alkemade and Forstmann. *Neuroimage* 110, 1–  
939 2.

- 940 Lévesque, J., and Parent, A. (2005). GABAergic interneurons in human subthalamic nucleus.  
941 *Movement Disord* 20, 574–584.
- 942 Li, Q., Ke, Y., Chan, D.C.W., Qian, Z.-M., Yung, K.K.L., Ko, H., Arbutnott, G.W., and Yung, W.-H.  
943 (2012). Therapeutic Deep Brain Stimulation in Parkinsonian Rats Directly Influences Motor Cortex.  
944 *Neuron* 76, 1030–1041.
- 945 Limousin, P., Pollak, P., Benazzouz, A., Hoffmann, D., Bas, J.-F.L., Perret, J.E., Benabid, A.-L.,  
946 and Broussolle, E. (1995). Effect on parkinsonian signs and symptoms of bilateral subthalamic  
947 nucleus stimulation. *Lancet* 345, 91–95.
- 948 Lozano, A.M., and Lipsman, N. (2013). Probing and Regulating Dysfunctional Circuits Using  
949 Deep Brain Stimulation. *Neuron* 77, 406–424.
- 950 Maier-Hein, K.H., Neher, P.F., Houde, J.-C., Côté, M.-A., Garyfallidis, E., Zhong, J., Chamberland,  
951 M., Yeh, F.-C., Lin, Y.-C., Ji, Q., et al. (2017). The challenge of mapping the human connectome  
952 based on diffusion tractography. *Nat Commun* 8, 1349.
- 953 Mallet, L., Schüpbach, M., N'Diaye, K., Remy, P., Bardinnet, E., Czernecki, V., Welter, M.-L.,  
954 Pelissolo, A., Ruberg, M., Agid, Y., et al. (2007). Stimulation of subterritories of the subthalamic  
955 nucleus reveals its role in the integration of the emotional and motor aspects of behavior. *Proc*  
956 *National Acad Sci* 104, 10661–10666.
- 957 Mallet, N., Micklem, B.R., Henny, P., Brown, M.T., Williams, C., Bolam, J.P., Nakamura, K.C.,  
958 and Magill, P.J. (2012). Dichotomous Organization of the External Globus Pallidus. *Neuron* 74,  
959 1075–1086.
- 960 Mastro, K.J., Bouchard, R.S., Holt, H.A.K., and Gittis, A.H. (2014). Transgenic Mouse Lines  
961 Subdivide External Segment of the Globus Pallidus (GPe) Neurons and Reveal Distinct GPe  
962 Output Pathways. *J Neurosci* 34, 2087–2099.
- 963 Mastro, K.J., Zitelli, K.T., Willard, A.M., Leblanc, K.H., Kravitz, A.V., and Gittis, A.H. (2017). Cell-  
964 specific pallidal intervention induces long-lasting motor recovery in dopamine-depleted mice. *Nat*  
965 *Neurosci* 20, 815–823.
- 966 Monakow, K.H., Akert, K., and Künzle, H. (1978). Projections of the precentral motor cortex and  
967 other cortical areas of the frontal lobe to the subthalamic nucleus in the monkey. *Exp Brain Res*  
968 33, 395–403.
- 969 Mosher, C.P., Mamelak, A.N., Malekmohammadi, M., Pouratian, N., and Rutishauser, U. (2021).  
970 Distinct roles of dorsal and ventral subthalamic neurons in action selection and cancellation.  
971 *Neuron* 109, 869-881.e6.
- 972 Mukherjee, A., Bajwa, N., Lam, N.H., Porrero, C., Clasca, F., and Halassa, M.M. (2020). Variation  
973 of connectivity across exemplar sensory and associative thalamocortical loops in the mouse. *Elife*  
974 9, e62554.
- 975 Naito, A., and Kita, H. (1994). The cortico-pallidal projection in the rat: an anterograde tracing  
976 study with biotinylated dextran amine. *Brain Res* 653, 251–257.



- 977 Nambu, A., Tokuno, H., and Takada, M. (2002). Functional significance of the cortico-  
978 subthalamo-pallidal 'hyperdirect' pathway. *Neurosci Res* 43, 111–117.
- 979 Oh, S., Chung, J., In, M., Zaitsev, M., Kim, Y., Speck, O., and Cho, Z. (2012). Distortion  
980 correction in EPI at ultra-high-field MRI using PSF mapping with optimal combination of shift  
981 detection dimension. *Magnet Reson Med* 68, 1239–1246.
- 982 Oh, S.W., Harris, J.A., Ng, L., Winslow, B., Cain, N., Mihalas, S., Wang, Q., Lau, C., Kuan, L.,  
983 Henry, A.M., et al. (2014). A mesoscale connectome of the mouse brain. *Nature* 508, 207–214.
- 984 Paek, S.H., Han, J.H., Lee, J.-Y., Kim, C., Jeon, B.S., and Kim, D.G. (2008). Electrode Position  
985 Determined by Fused Images of Preoperative and Postoperative Magnetic Resonance Imaging  
986 and Surgical Outcome after Subthalamic Nucleus Deep Brain Stimulation. *Neurosurgery* 63, 925–  
987 937.
- 988 Parent, A., and Hazrati, L.-N. (1995). Functional anatomy of the basal ganglia. II. The place of  
989 subthalamic nucleus and external pallidum in basal ganglia circuitry. *Brain Res Rev* 20, 128–154.
- 990 Peng, T., Thorn, K., Schroeder, T., Wang, L., Theis, F.J., Marr, C., and Navab, N. (2017). A  
991 BaSiC tool for background and shading correction of optical microscopy images. *Nat Commun* 8,  
992 14836.
- 993 Petersen, M.V., Mlakar, J., Haber, S.N., Parent, M., Smith, Y., Strick, P.L., Griswold, M.A., and  
994 McIntyre, C.C. (2019). Holographic Reconstruction of Axonal Pathways in the Human Brain.  
995 *Neuron* 104, 1056-1064.e3.
- 996 Plantinga, B.R., Roebroek, A., Kemper, V.G., Uludağ, K., Melse, M., Mai, J., Kuijf, M.L., Herrler,  
997 A., Jahanshahi, A., Romeny, B.M. ter H., et al. (2016). Ultra-High Field MRI Post Mortem  
998 Structural Connectivity of the Human Subthalamic Nucleus, Substantia Nigra, and Globus  
999 Pallidus. *Front Neuroanat* 10, 66.
- 1000 Plantinga, B.R., Temel, Y., Duchin, Y., Uludağ, K., Patriat, R., Roebroek, A., Kuijf, M.,  
1001 Jahanshahi, A., Romenij, B. ter H., Vitek, J., et al. (2018). Individualized parcellation of the  
1002 subthalamic nucleus in patients with Parkinson's disease with 7T MRI. *Neuroimage* 168, 403–411.
- 1003 Roccaro-Waldmeyer, D.M., Girard, F., Milani, D., Vannoni, E., Prétôt, L., Wolfer, D.P., and Celio,  
1004 M.R. (2018). Eliminating the VGlut2-Dependent Glutamatergic Transmission of Parvalbumin-  
1005 Expressing Neurons Leads to Deficits in Locomotion and Vocalization, Decreased Pain  
1006 Sensitivity, and Increased Dominance. *Front Behav Neurosci* 12, 146.
- 1007 Schaltenbrand, G., and Wahren, W. (1998). Atlas for Stereotaxy of the Human Brain (Stuttgart  
1008 Thieme).
- 1009 Shang, C., Liu, Z., Chen, Z., Shi, Y., Wang, Q., Liu, S., Li, D., and Cao, P. (2015). A parvalbumin-  
1010 positive excitatory visual pathway to trigger fear responses in mice. *Science* 348, 1472–1477.
- 1011 Smith, Y., Bevan, M.D., Shink, E., and Bolam, J.P. (1998). Microcircuitry of the direct and indirect  
1012 pathways of the basal ganglia. *Neuroscience* 86, 353–387.



- 1013 Song, J.H., Lucaci, D., Calangiu, I., Brown, M.T.C., Park, J.S., Kim, J., Brickley, S.G., and  
1014 Chadderton, P. (2018). Combining mGRASP and Optogenetics Enables High-Resolution  
1015 Functional Mapping of Descending Cortical Projections. *Cell Reports* 24, 1071–1080.
- 1016 Stefani, A., Fedele, E., Galati, S., Pepicelli, O., Frasca, S., Pierantozzi, M., Peppe, A., Brusa, L.,  
1017 Orlacchio, A., Hainsworth, A.H., et al. (2005). Subthalamic stimulation activates internal pallidus:  
1018 Evidence from cGMP microdialysis in PD patients. *Ann Neurol* 57, 448–452.
- 1019 Steigerwald, F., Pottter, M., Herzog, J., Pinsker, M., Kopper, F., Mehdorn, H., Deuschl, G., and  
1020 Volkmann, J. (2008). Neuronal Activity of the Human Subthalamic Nucleus in the Parkinsonian  
1021 and Nonparkinsonian State. *J Neurophysiol* 100, 2515–2524.
- 1022 Tervo, D.G.R., Hwang, B.-Y., Viswanathan, S., Gaj, T., Lavzin, M., Ritola, K.D., Lindo, S., Michael,  
1023 S., Kuleshova, E., Ojala, D., et al. (2016). A Designer AAV Variant Permits Efficient Retrograde  
1024 Access to Projection Neurons. *Neuron* 92, 372–382.
- 1025 Tomer, R., Ye, L., Hsueh, B., and Deisseroth, K. (2014). Advanced CLARITY for rapid and high-  
1026 resolution imaging of intact tissues. *Nat Protoc* 9, 1682–1697.
- 1027 Tournier, J.-D., Calamante, F., and Connelly, A. (2010). Improved probabilistic streamlines  
1028 tractography by 2 order integration over fibre orientation distributions *Proc. Intl. S. Proc. Intl. Soc.*  
1029 *Mag. Reson. Med* 18.
- 1030 Turrigiano, G. (2011). Too Many Cooks? Intrinsic and Synaptic Homeostatic Mechanisms in  
1031 Cortical Circuit Refinement. *Neuroscience* 34, 89–103.
- 1032 Wallace, M.L., Saunders, A., Huang, K.W., Philson, A.C., Goldman, M., Macosko, E.Z., McCarroll,  
1033 S.A., and Sabatini, B.L. (2017). Genetically Distinct Parallel Pathways in the Entopeduncular  
1034 Nucleus for Limbic and Sensorimotor Output of the Basal Ganglia. *Neuron* 94, 138-152.e5.
- 1035 Wang, Q., Ding, S.-L., Li, Y., Royall, J., Feng, D., Lesnar, P., Graddis, N., Naeemi, M., Facer, B.,  
1036 Ho, A., et al. (2020). The Allen Mouse Brain Common Coordinate Framework: A 3D Reference  
1037 Atlas. *Cell* 181, 936-953.e20.
- 1038 Windels, F., Bruet, N., Poupard, A., Urbain, N., Chouvet, G., Feuerstein, C., and Savasta, M.  
1039 (2000). Effects of high frequency stimulation of subthalamic nucleus on extracellular glutamate  
1040 and GABA in substantia nigra and globus pallidus in the normal rat. *Eur J Neurosci* 12, 4141–  
1041 4146.
- 1042 Winnubst, J., Bas, E., Ferreira, T.A., Wu, Z., Economo, M.N., Edson, P., Arthur, B.J., Bruns, C.,  
1043 Rokicki, K., Schauder, D., et al. (2019). Reconstruction of 1,000 Projection Neurons Reveals New  
1044 Cell Types and Organization of Long-Range Connectivity in the Mouse Brain. *Cell* 179, 268-  
1045 281.e13.
- 1046 Wodarg, F., Herzog, J., Reese, R., Falk, D., Pinsker, M.O., Steigerwald, F., Jansen, O., Deuschl,  
1047 G., Mehdorn, H.M., and Volkmann, J. (2012). Stimulation site within the MRI-defined STN  
1048 predicts postoperative motor outcome. *Movement Disord* 27, 874–879.
- 1049 Wu, X.H., Song, J.J., Faull, R.L.M., and Waldvogel, H.J. (2018). GABAA and GABAB receptor  
1050 subunit localization on neurochemically identified neurons of the human subthalamic nucleus. *J*  
1051 *Comp Neurol* 526, 803–823.

1052 Yizhar, O., Fenno, L.E., Prigge, M., Schneider, F., Davidson, T.J., O'Shea, D.J., Sohal, V.S.,  
1053 Goshen, I., Finkelstein, J., Paz, J.T., et al. (2011). Neocortical excitation/inhibition balance in  
1054 information processing and social dysfunction. *Nature* 477, 171–178.

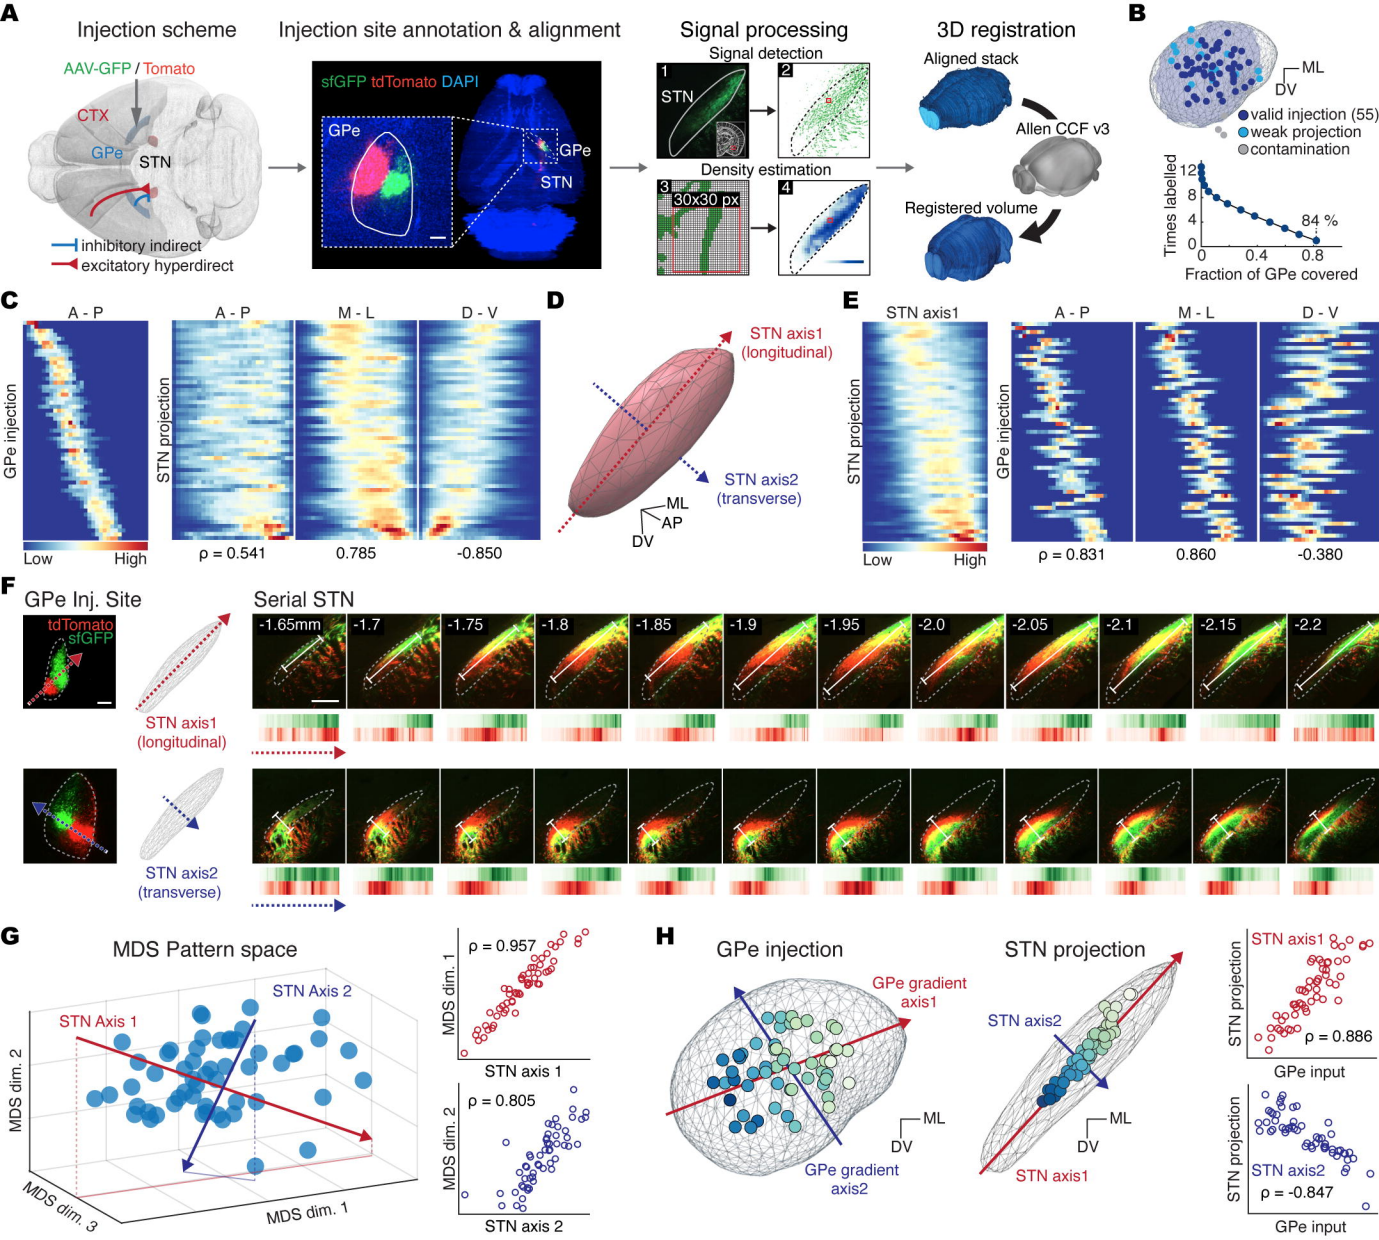

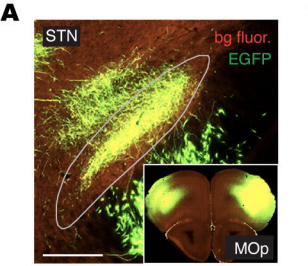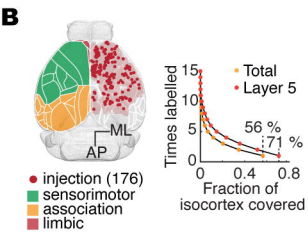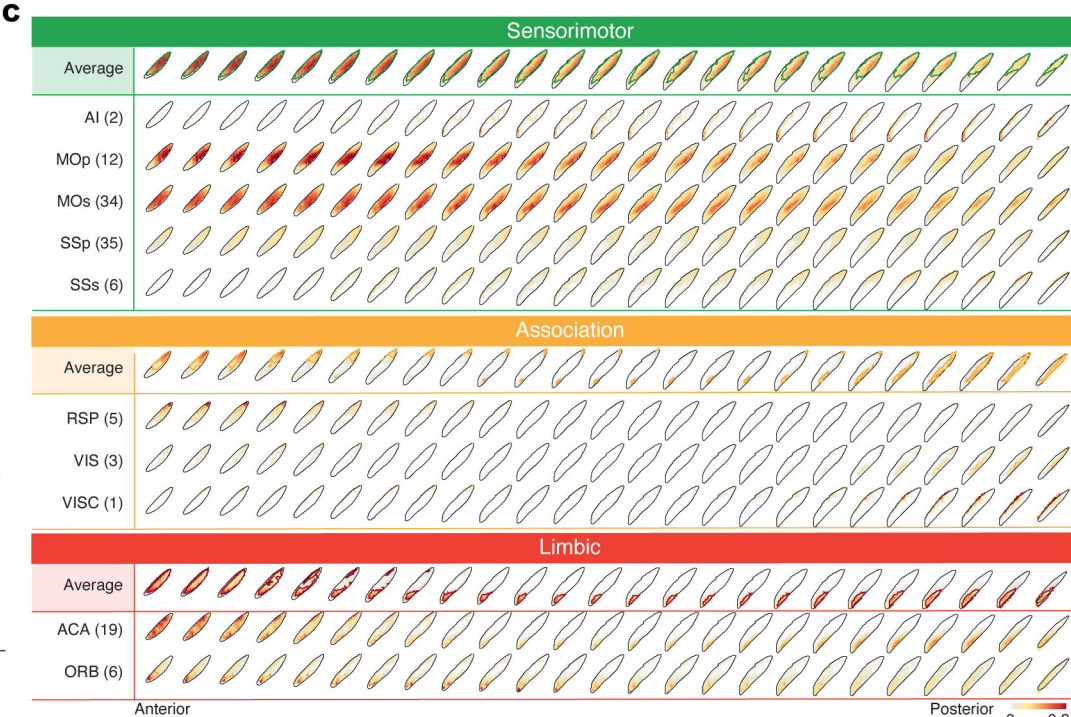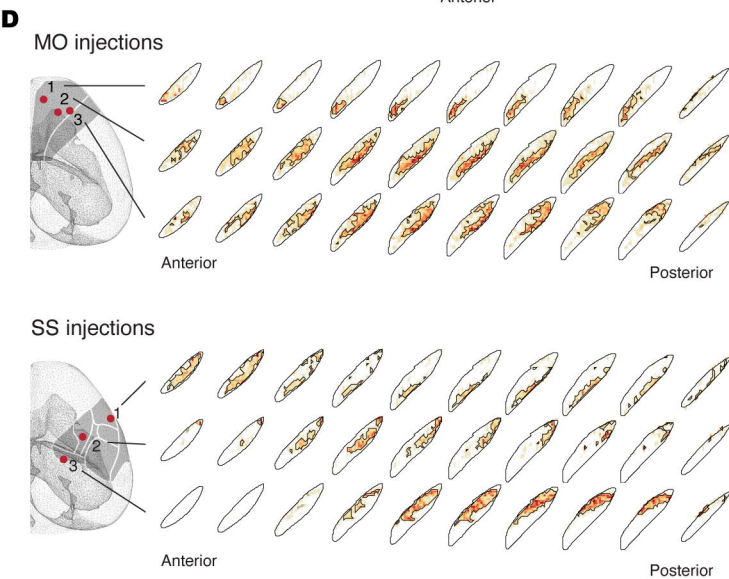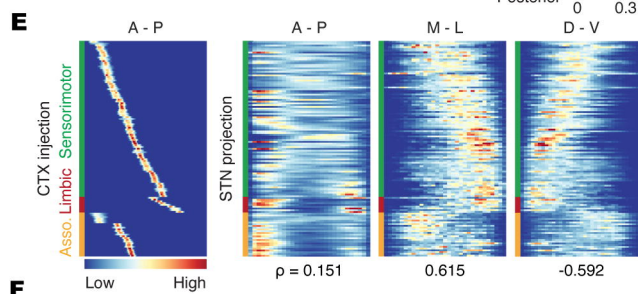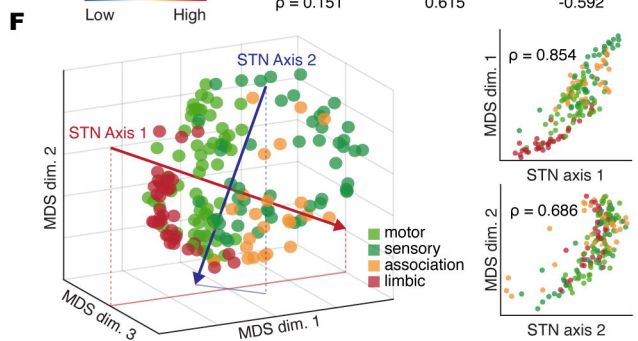



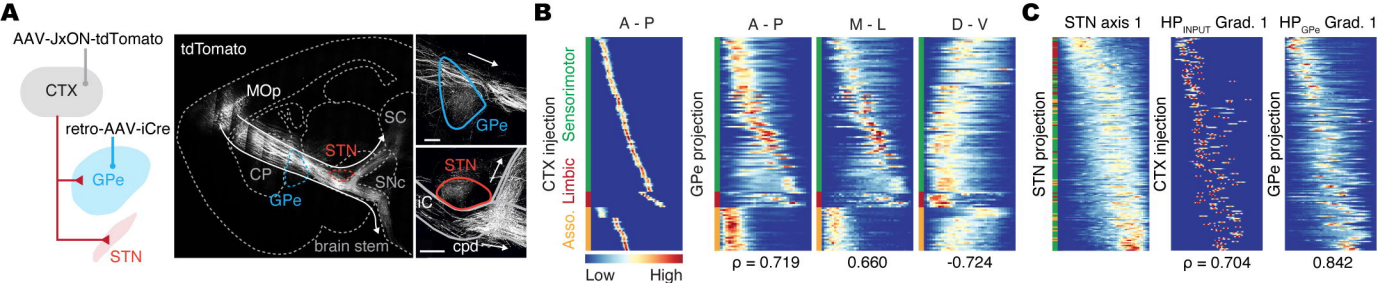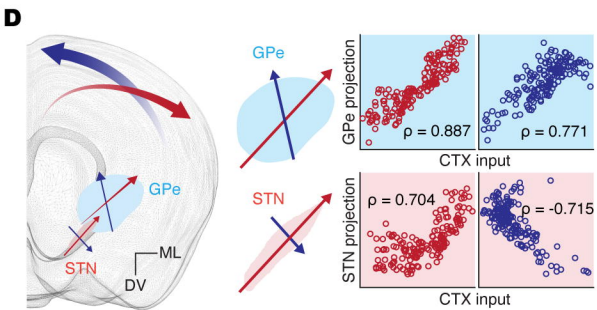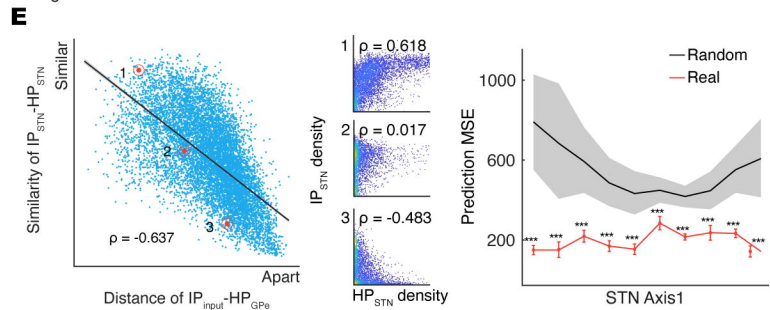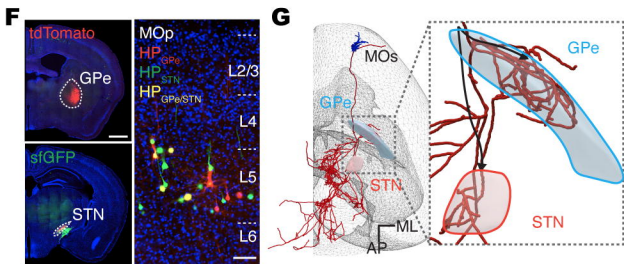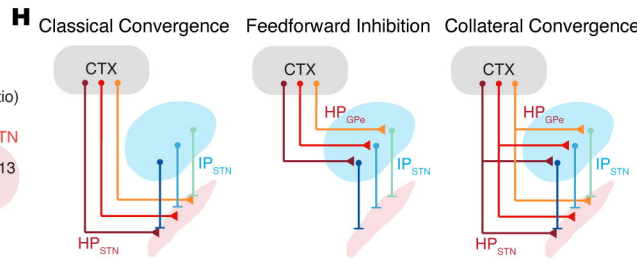

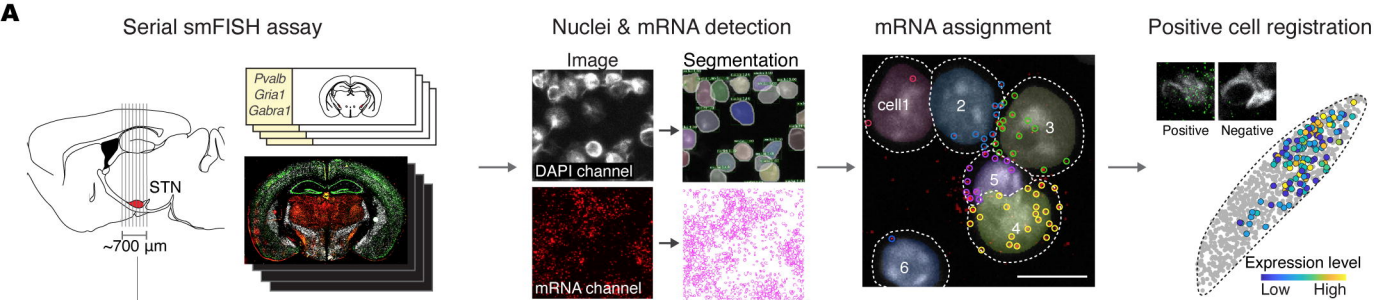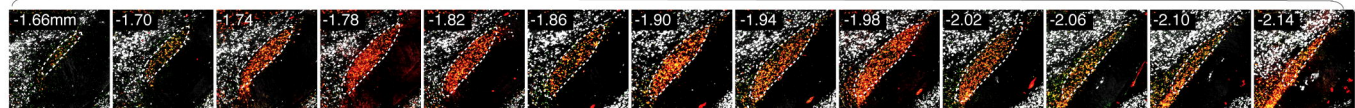

Serial STN

**B**

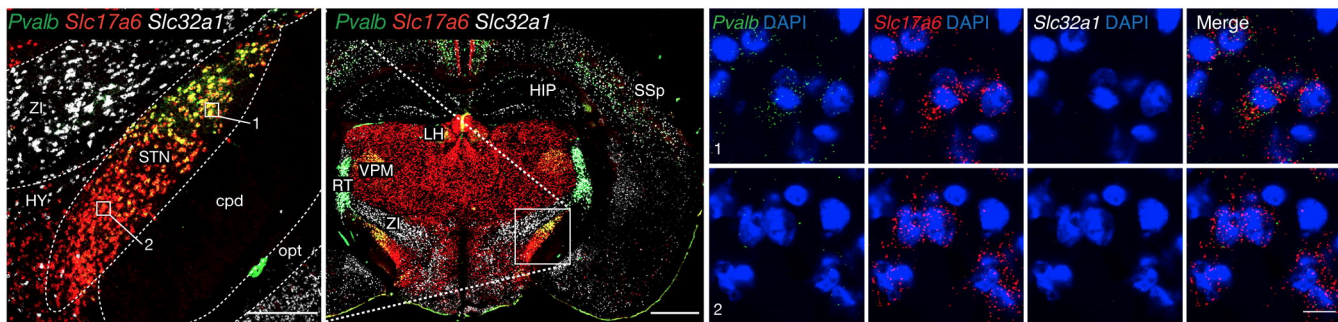

**C**

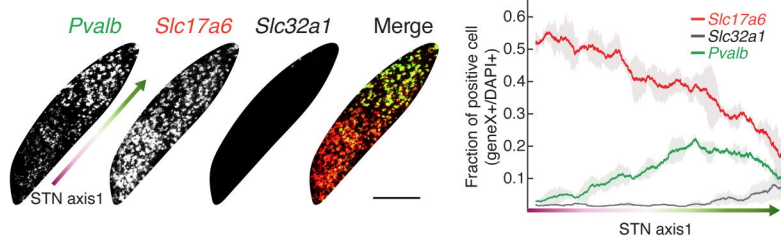

**D**

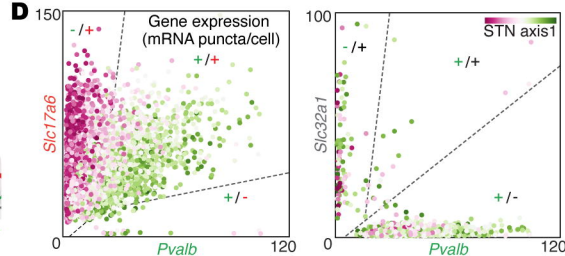

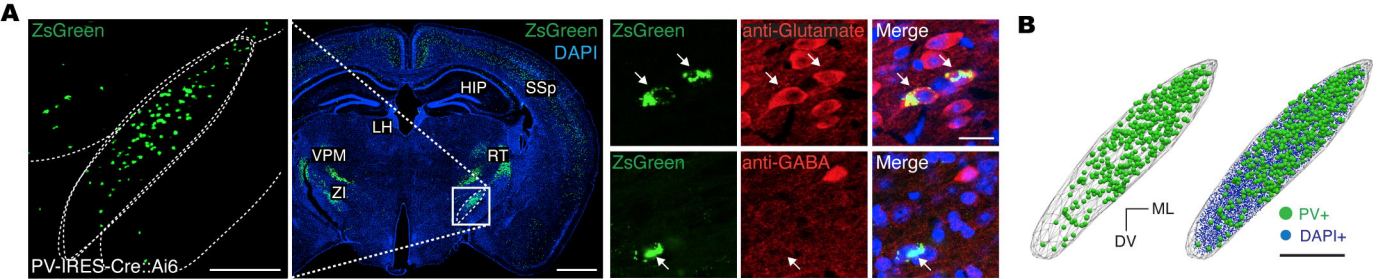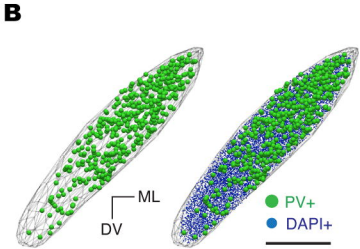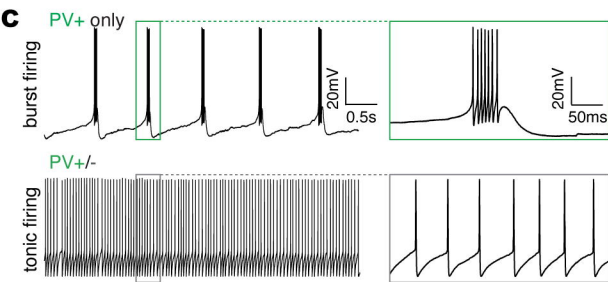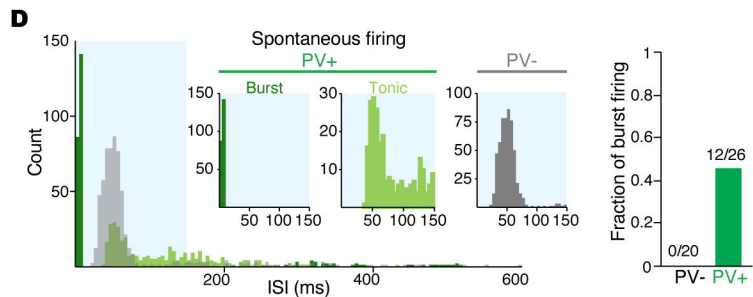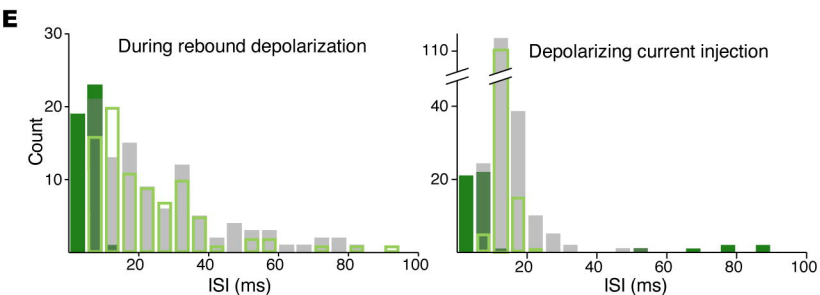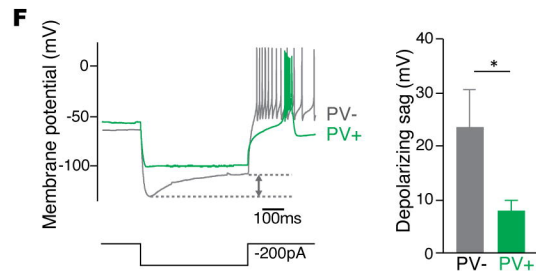



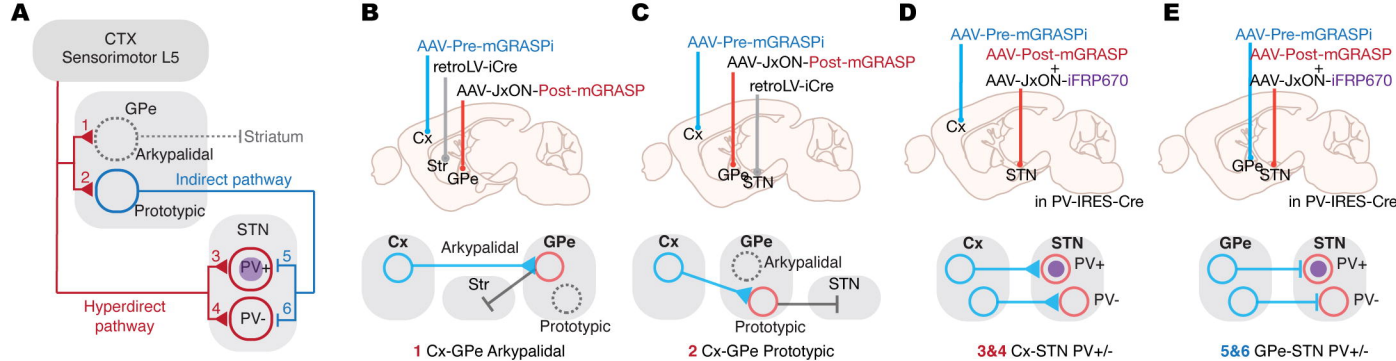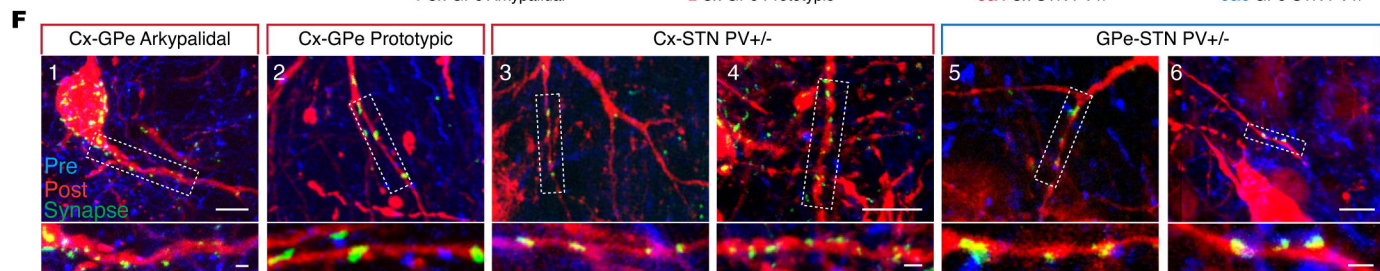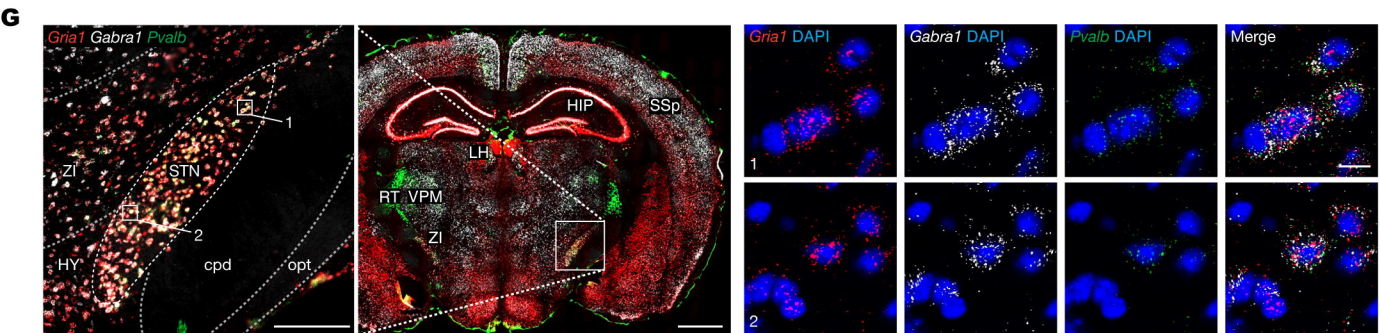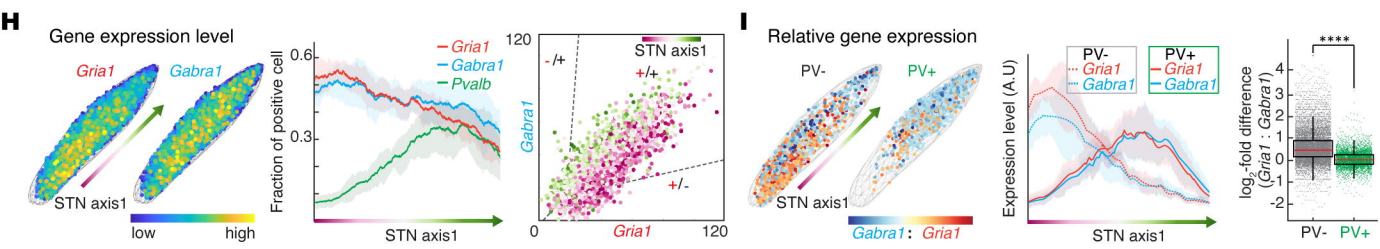



**A**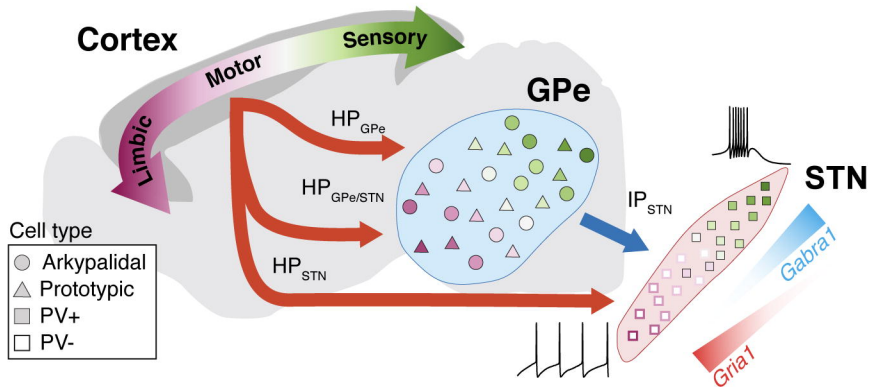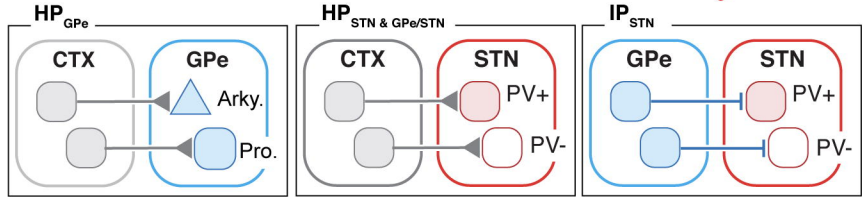**B**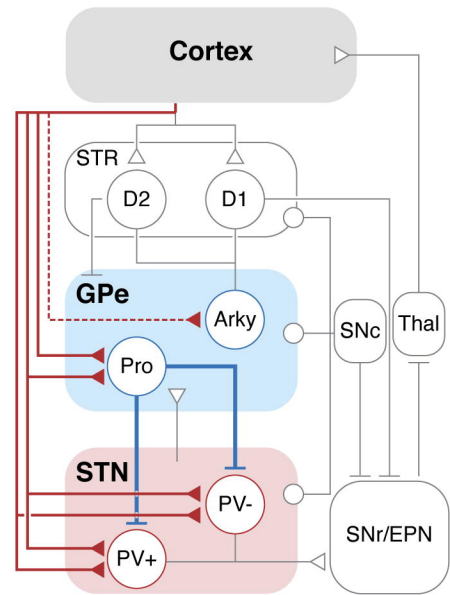

Source: https://biorxiv.org/content/10.1101/2021.10.01.462690v1.full.pdf
